# Supplementary material for: Report and Comparative Genomics of an NDM-5-Producing Escherichia coli in a Portuguese Hospital: Complex Class 1 Integrons as Important Players in blaNDM Spread
Source: Microorganisms. 2022 Nov 12;10(11):2243. doi: 10.3390/microorganisms10112243 (PMC9693474; doi:10.3390/microorganisms10112243)
Supplement: Supplementary file 1 [file microorganisms-10-02243-s001.zip]

Archive with 6 entries (6 files):
- Figure S2.pdf
- Figure S3.pdf
- Supplementary material.pdf
- Table S4.xlsx
- Table S5.xlsx
- Table S7.xlsx
