# Supplementary material for: Report and Comparative Genomics of an NDM-5-Producing Escherichia coli in a Portuguese Hospital: Complex Class 1 Integrons as Important Players in blaNDM Spread
Source: Microorganisms. 2022 Nov 12;10(11):2243. doi: 10.3390/microorganisms10112243 (PMC9693474; doi:10.3390/microorganisms10112243)
Supplement: Supplementary file 1 [file microorganisms-10-02243-s001.zip › Table S4.xlsx]

## Sheet: Table
GenBank plasmid sequences	Accession	Hit descriptive values for overall plasmid comparisons					Hit descriptive values for NDM-containing complex class 1 integrons					NDM-containing complex class 1 integron arrays	Plasmid incompatibilty group	Sequence-associated metadata
		Max Score	Total Score	Query Cover	E value	Per. Ident	Max Score	Total Score	Query Cover	E value	Per. Ident			Country	Source	ARG	Sequence type
Escherichia coli strain 15978 plasmid pHN15978-1,complete sequence	MK291500.1	2.364e+05	2.604e+05	1	0.0	100.00%	29038	34393	1	0.0	99,99%	intI1Δ|qepA4|ISCR3|groEL|dfrA12|gcuF|aadA2|qacEΔ1|sul1|ISCR1|tat|trp|bleMBL|blaNDM-5	FIB-FII	Pakistan	Retail meat	NDM-5	ST156			Identical or highly similar plasmids
Escherichia coli strain FDAARGOS_448 plasmid unnamed1, complete sequence	CP023959.1	2.364e+05	2.604e+05	1	0.0	99.99%	29033	34389	1	0.0	99,99%	intI1Δ|qepA4|ISCR3|groEL|dfrA12|gcuF|aadA2|qacEΔ1|sul1|ISCR1|tat|trp|bleMBL|blaNDM-5	FIB-FII	Canada	Urine (clinical)	NDM-5	ST405			Similar plasmids
Escherichia coli strain AR_452 plasmid unnamed1, complete sequence	CP030329.1	2.109e+05	2.604e+05	1	0.0	100.00%	26357	34396	1	0.0	100,00%	intI1Δ|qepA4|ISCR3|groEL|dfrA12|gcuF|aadA2|qacEΔ1|sul1|ISCR1|tat|trp|bleMBL|blaNDM-5	FIB-FII	Unknown	Unknown	NDM-5	ST156			Less similar plasmids
Escherichia coli strain Survcare321 plasmid p321-NDM5, complete sequence	CP076302.1	181800	257200	0.99	0	0.9999	25979	31265	95%	0.0	99.99%	intI1Δ|qepA4|ISCR3|groEL|dfrA12|gcuF|aadA2|qacEΔ1|sul1|ISCR1|dsbD|tat|bleMBL|blaNDM-5	FIB-FII	Germany	Urine (catheter)	NDM-5	ST405
Escherichia coli strain ARL09/232 plasmid pCO_Eco4457-3, complete sequence	CP049970.1	1.152e+05	1.986e+05	0.78	0.0	99.95%							FIB-FII	New Zealand	Urine	-	ST7505
Escherichia coli JJ1887 plasmid pJJ1887-5, complete sequence	CP014320.1	1.082e+05	2.547e+05	0.94	0.0	99.92%							FIB-FII	USA	Cystites	-	ST131
Escherichia coli strain MS6198 plasmid pMS6198B, complete sequence	CP015836.1	85257	2.504e+05	0.89	0.0	100.00%							FIB-FII	UK	Urine	CTX-M-15	ST648
Escherichia coli YJ4 plasmid pYJ4-a DNA, complete genome	AP023232.1	83076	2.168e+05	0.85	0.0	99.99%							FIB-FII	Myanmar	Stool	CTX-M-15	ST8453
Escherichia coli M505 plasmid pM505-a DNA, complete genome	AP023221.1	83059	2.169e+05	0.85	0.0	99.98%							FIB-FII	Myanmar	Clinical	CTX-M-15	ST8453
Escherichia coli strain 11011 plasmid p11011-fosA, complete sequence	MG764548.1	54028	1.698e+05	0.45	0.0	99.79%
Escherichia coli strain CM IVRI KOL-1 plasmid p1ESCUMpO83_CORR	CP033159.1	54008	1.569e+05	0.54	0.0	99.77%	17897	29231	0.79	0.0	99,99%	intI1Δ|dfrA12|gcuF|aadA2|qacEΔ1|sul1|ISCR1|tat|trp|bleMBL|blaNDM-5	FIA-FII	India	Mastitis Milk	NDM-5	-
Escherichia coli plasmid pV323-a DNA, contig: V323-a_scaffold_1, strain: V323	LC056631.1	53882	82841	0.36	0.0	99.63%
Escherichia coli strain 164 plasmid pC-F-164_A-OXA140, complete sequence	CP048368.1	46135	1.159e+05	0.49	0.0	99.77%	17897	34335	0.79	0.0	99,99%	intI1Δ|dfrA12|gcuF|aadA2|qacEΔ1|sul1|ISCR1|tat|trp|bleMBL|blaNDM-5	FIA-FII	Switzerland	Environmental	NDM-5	-
Escherichia coli O25b:H4-ST131 strain B28 plasmid pB28, complete sequence	MK295820.1	33218	1.239e+05	0.55	0.0	98.94%
Escherichia coli strain 14E509 plasmid p14E509-1FII, complete sequence	MN822124.1	32108	1.258e+05	0.47	0.0	99.77%
Escherichia coli strain 52148 plasmid p52148_NDM_5, complete sequence	CP050384.1	32108	1.096e+05	0.47	0.0	99.77%
Escherichia coli strain ECOL-18-VL-LA-PA-Ryan-0026 plasmid p45407_1, complete sequence	CP041393.1	32108	1.121e+05	0.47	0.0	99.77%
Escherichia coli strain AR435 plasmid unnamed1, complete sequence	CP029113.1	32108	93771	0.41	0.0	99.77%
Escherichia coli strain FDAARGOS_434 plasmid unnamed1, complete sequence	CP023871.1	32108	1.627e+05	0.52	0.0	99.77%	17887	43467	0.76	0.0	99,97%	intI1Δ|dfrA12|gcuF|aadA2|qacEΔ1|sul1|ISCR1|tat|trp|bleMBL|blaNDM-5	FIA-FII	Canada	Rectal sample	NDM-5	-
Escherichia coli strain Y5 plasmid pECY55, complete sequence	KU043115.1	32108	1.289e+05	0.47	0.0	99.77%
Escherichia coli strain 15-50 plasmid pEC15-MCR-50, complete sequence	MG656414.1	32070	1.513e+05	0.47	0.0	99.74%
Escherichia coli strain 06028078 plasmid p28078-NDM, complete sequence	MF156713.1	31940	1.410e+05	0.52	0.0	99.62%	17667	35592	0.79	0.0	99,49%	intI1Δ|dfrA12|gcuF|aadA2|qacEΔ1|sul1|ISCR1|tat|trp|bleMBL|blaNDM-5	FIA-FII	China	Unknown	NDM-5	-
Escherichia coli str. Sanji plasmid pSJ_94, complete sequence	CP011064.1	30925	1.059e+05	0.41	0.0	99.76%
Escherichia coli strain CRE1493 plasmid p1493-5, complete sequence	CP019076.1	30729	1.322e+05	0.47	0.0	99.76%
Escherichia coli strain 5P plasmid pVSI_NDM_5, complete sequence	MN197360.1	29833	94289	0.37	0.0	99.69%
Escherichia coli strain 15RDA-Livestock feces-ECO087 chromosome	CP043541.1	27414	1.354e+05	0.44	0.0	98.59%
Escherichia coli strain CFS3273 plasmid pCFS3273-2, complete sequence	CP026934.1	27414	95014	0.39	0.0	98.59%
Escherichia coli strain FAM21845 plasmid pFAM21845_1, complete sequence	CP017221.1	27414	1.134e+05	0.47	0.0	98.59%
Escherichia coli strain FAM22871 plasmid pFAM22871_1, complete sequence	KU355873.1	27414	1.129e+05	0.46	0.0	98.59%
Salmonella enterica subsp. enterica serovar Heidelberg plasmid pSH163_120, complete sequence	JN983046.1	27414	1.077e+05	0.45	0.0	98.59%
Salmonella enterica subsp. enterica strain AR-0401 plasmid pAR-0401-2, complete sequence	CP044190.1	27396	1.076e+05	0.45	0.0	98.57%
Escherichia coli strain 2009C-3133 plasmid unnamed3, complete sequence	CP013027.1	27359	1.327e+05	0.46	0.0	98.28%
Escherichia coli strain ATCC 700415 plasmid unnamed, complete sequence	CP022610.1	27338	1.105e+05	0.45	0.0	98.52%
Salmonella enterica subsp. enterica serovar Heidelberg plasmid pSH696_117, complete sequence	JN983047.1	27100	1.013e+05	0.43	0.0	98.23%
Escherichia coli strain SCEC020007 plasmid pNDM5_020007, complete sequence	CP025626.1	26169	1.683e+05	0.52	0.0	99.77%
Escherichia coli strain 91 plasmid p91_NDM5, complete sequence	MN007141.1	25130	1.133e+05	0.49	0.0	99.75%	17897	28728	0.79	0.0	99,99%	intI1Δ|dfrA12|gcuF|aadA2|qacEΔ1|sul1|ISCR1|tat|trp|bleMBL|blaNDM-5	FIA-FII	Italy	Fecal swab	NDM-5	-
Escherichia coli M309 plasmid pM309-NDM5 DNA, complete sequence	AP018833.1	25130	1.131e+05	0.49	0.0	99.75%	17897	34645	0.79	0.0	99,99%	intI1Δ|dfrA12|gcuF|aadA2|qacEΔ1|sul1|ISCR1|tat|trp|bleMBL|blaNDM-5	FIA-FII	Myanmar	Clinical	NDM-5	ST167
Escherichia coli strain AR_0119 plasmid unitig_2, complete sequence	CP021536.1	24044	1.568e+05	0.59	0.0	99.85%
Escherichia coli plasmid pV318-a DNA, contig: V318-a_scaffold_2.1, strain: V318	LC056603.1	22993	26485	0.11	0.0	99.67%
Escherichia coli 0089K contig 0089K-ColE2-MccJ25 genomic sequence	MK878530.1	22578	87596	0.36	0.0	95.66%
Escherichia coli plasmid pC59-153, complete sequence	KJ484636.1	22515	89662	0.35	0.0	95.57%
Escherichia coli strain 1108 plasmid p1108-IncFIB, complete sequence	MG825378.1	22482	69370	0.32	0.0	95.55%
Escherichia coli strain 16-50 plasmid pNDM-EC16-50, complete sequence	MG515250.1	22070	1.040e+05	0.44	0.0	99.87%
Escherichia coli strain AR_0150 plasmid tig00000255, complete sequence	CP021737.1	21725	1.242e+05	0.48	0.0	99.72%
Escherichia coli isolate EC-1639 genome assembly, plasmid: 2	LR025102.1	21675	1.074e+05	0.33	0.0	99.95%
Escherichia coli strain NMBU-W10C18 plasmid pNMBU-W10C18_01, complete sequence	CP044404.1	20740	1.228e+05	0.48	0.0	99.97%
Escherichia coli plasmid pLZ135-CTX, complete sequence	MF353155.1	20338	1.049e+05	0.42	0.0	99.90%
Escherichia coli strain 3A11 plasmid pHN3A11, complete sequence	JX997935.2	19703	96153	0.41	0.0	99.26%
Escherichia coli strain ECwhn14 plasmid pECwhn14, complete sequence	CP012197.1	19677	1.454e+05	0.5	0.0	99.28%
Escherichia coli strain 13KWH46 plasmid p13KWH46-1, complete sequence	CP019251.1	19549	1.231e+05	0.45	0.0	96.18%
Salmonella enterica subsp. enterica strain BAA-1672 plasmid pSalSendai, complete sequence	CP023471.1	19499	61189	0.29	0.0	96.08%
Morganella morganii MH16-367M plasmid pMH16-367M_1 DNA, complete genome	AP018565.2	18969	32382	0.13	0.0	98.92%
Escherichia coli strain SDCRK18-7 plasmid pNDM-SDCRK18-7, complete sequence	MN641485.1	18330	96131	0.36	0.0	100.00%	17901	45841	0.79	0.0	100,00%	intI1Δ|dfrA12|gcuF|aadA2|qacEΔ1|sul1|ISCR1|tat|trp|bleMBL|blaNDM-5	FII	Unknown	Unknown	NDM-5	-
Escherichia coli strain 163 plasmid pC-F-163_C, complete sequence	CP048374.1	18330	19846	0.08	0.0	100.00%	17901	21061	0.76	0.0	100,00%	intI1Δ|dfrA12|gcuF|aadA2|qacEΔ1|sul1|ISCR1|tat|trp|bleMBL|blaNDM-5	-	Switzerland	Environmental	NDM-5	-
Escherichia coli strain 219 plasmid unnamed, complete sequence	CP020515.1	18330	94804	0.42	0.0	100.00%	17901	37173	0.79	0.0	100,00%	intI1Δ|dfrA12|gcuF|aadA2|qacEΔ1|sul1|ISCR1|tat|trp|bleMBL|blaNDM-5	FIA-FIB-FII	USA	Blood	NDM-5	-
Escherichia coli plasmid pM217_FII DNA, complete genome, isolate: M217	AP018147.1	18330	1.312e+05	0.53	0.0	100.00%	17901	34377	0.84	0.0	100,00%	intI1Δ|dfrA12|gcuF|aadA2|qacEΔ1|sul1|ISCR1|tat|trp|bleMBL|blaNDM-5	FII	Myanmar	Clinical	NDM-5	ST167
Escherichia coli YJ6 plasmid pYJ6-NDM5 DNA, complete genome	AP023236.1	18325	1.144e+05	0.48	0.0	99.99%	17897	35309	0.84	0.0	99,99%	intI1Δ|dfrA12|gcuF|aadA2|qacEΔ1|sul1|ISCR1|tat|trp|bleMBL|blaNDM-5	FII	Myanmar	Commensal	NDM-5	-
Escherichia coli M505 plasmid pM505-NDM5 DNA, complete genome	AP023220.1	18325	1.184e+05	0.5	0.0	99.99%	17897	35255	0.84	0.0	99,99%	intI1Δ|dfrA12|gcuF|aadA2|qacEΔ1|sul1|ISCR1|tat|trp|bleMBL|blaNDM-5	FII	Myanmar	Clinical	NDM-5	ST8453
Escherichia coli strain AR216.2b plasmid pMPNDM-5, complete sequence	CP043944.1	18325	76997	0.23	0.0	99.99%	17897	30137	0.76	0.0	99,99%	intI1Δ|dfrA12|gcuF|aadA2|qacEΔ1|sul1|ISCR1|tat|trp|bleMBL|blaNDM-5	FIA-FIB-FII	Switzerland	Dog rectal swab	NDM-5	ST167
Escherichia coli strain AR202.2 plasmid pMPNDM-5, complete sequence	CP043948.1	18325	76955	0.23	0.0	99.99%	17897	30137	0.76	0.0	99,99%	intI1Δ|dfrA12|gcuF|aadA2|qacEΔ1|sul1|ISCR1|tat|trp|bleMBL|blaNDM-5	FIA-FIB-FII	Switzerland	Dog rectal swab	NDM-5	ST167
Escherichia coli strain 222 plasmid unnamed3, complete sequence	CP020517.1	18325	90759	0.41	0.0	99.99%	17897	36252	0.82	0.0	99,99%	intI1Δ|dfrA12|gcuF|aadA2|qacEΔ1|sul1|ISCR1|tat|trp|bleMBL|blaNDM-5	FII	USA	Urine	NDM-5	-
Escherichia coli strain UK_Dog_Liverpool chromosome, complete genome	CP031653.1	18325	55934	0.24	0.0	99.99%	17897	27469	0.78	0.0	99,99%	intI1Δ|dfrA12|gcuF|aadA2|qacEΔ1|sul1|ISCR1|tat|trp|bleMBL|blaNDM-5	Chromossome	UK	Dog infected wound	NDM-5	ST410
Escherichia coli strain 51008369SK1 plasmid p51008369SK1_E, complete sequence	CP029978.1	18325	39286	0.16	0.0	99.99%	17897	30137	0.76	0.0	99,99%	intI1Δ|dfrA12|gcuF|aadA2|qacEΔ1|sul1|ISCR1|tat|trp|bleMBL|blaNDM-5	FIA-FIB-FII	Switzerland	Dog wound liquid	NDM-5	-
Escherichia coli strain Ec001 plasmid pNDM-5-IT, complete sequence	MG649062.1	18325	77237	0.23	0.0	99.99%	17897	30058	0.76	0.0	99,99%	intI1Δ|dfrA12|gcuF|aadA2|qacEΔ1|sul1|ISCR1|tat|trp|bleMBL|blaNDM-5	FIA-FIB-FII	Italy	Clinical (UTI)	NDM-5	ST167
Escherichia coli strain ECONIH6 plasmid pNDM-d2e9, complete sequence	CP026201.1	18325	91790	0.41	0.0	99.99%	17897	34964	0.86	0.0	99,99%	intI1Δ|dfrA12|gcuF|aadA2|qacEΔ1|sul1|ISCR1|tat|trp|bleMBL|blaNDM-5	FII	USA	Hospital plumbing	NDM-5	-
Escherichia coli strain AMA1167 plasmid pAMA1167-NDM-5, complete sequence	CP024805.1	18325	1.223e+05	0.36	0.0	99.99%	17897	52808	0.76	0.0	99,99%	intI1Δ|dfrA12|gcuF|aadA2|qacEΔ1|sul1|ISCR1|tat|trp|bleMBL|blaNDM-5	FIA-FIB-FII-Q1	Denmark	Liver	NDM-5	ST410
Escherichia coli strain FDAARGOS_433 plasmid unnamed2, complete sequence	CP023895.1	18325	1.172e+05	0.49	0.0	99.99%	17897	33090	0.83	0.0	99,99%	intI1Δ|dfrA12|gcuF|aadA2|qacEΔ1|sul1|ISCR1|tat|trp|bleMBL|blaNDM-5	FII	Canada	Rectal sample	NDM-5	-
Escherichia coli plasmid pLZ135-NDM, complete sequence	MF353156.1	18325	1.062e+05	0.37	0.0	99.99%	17897	45987	0.79	0.0	99,99%	intI1Δ|dfrA12|gcuF|aadA2|qacEΔ1|sul1|ISCR1|tat|trp|bleMBL|blaNDM-5	FII	China	Clinical	NDM-5	-
Escherichia coli plasmid pM107_FII DNA, complete genome, isolate: M107	AP018138.1	18325	1.092e+05	0.45	0.0	99.99%	17897	34373	0.84	0.0	99,99%	intI1Δ|dfrA12|gcuF|aadA2|qacEΔ1|sul1|ISCR1|tat|trp|bleMBL|blaNDM-5	FII	Myanmar	Clinical	NDM-5	ST410
Escherichia coli strain 675SK2 plasmid p675SK2_B, complete sequence	CP027703.1	18323	1.720e+05	0.56	0.0	99.99%	17893	38442	0.76	0.0	99,99%	intI1Δ|dfrA12|gcuF|aadA2|qacEΔ1|sul1|ISCR1|tat|trp|bleMBL|blaNDM-5	FIA-FIB-FII	Switzerland	Wastewater	NDM-5	-
Escherichia coli strain EC-15-3 plasmid pEC-15-3-NDM-1, complete sequence	MN061455.1	18319	1.140e+05	0.35	0.0	99.98%	17892	69954	0.79	0.0	99,98%	intI1Δ|dfrA12|gcuF|aadA2|qacEΔ1|sul1|ISCR1|tat|trp|bleMBL|blaNDM-1	FII	China	Urine	NDM-1	-
Klebsiella pneumoniae strain KL8 plasmid pKL8-NDM, complete sequence	MH523448.1	18319	79289	0.34	0.0	99.98%	17892	21052	0.76	0.0	99,98%	intI1|dfrA12|gcuF|aadA2|qacEΔ1|sul1|ISCR1|tat|trp|bleMBL|blaNDM-1	FIA-FIB-FII	Unknown	Unknown	NDM-1	-
Citrobacter freundii strain 2262 plasmid pNDM-2262, complete sequence	MH892479.1	18319	50958	0.11	0.0	99.98%	17892	44695	0.76	0.0	99,98%	intI1Δ|dfrA12|gcuF|aadA2|qacEΔ1|sul1|ISCR1|tat|trp|bleMBL|blaNDM-1	C	China	Clinical	NDM-1	-
Escherichia coli isolate Escherichia coli str. 3426 genome assembly, plasmid: 4	LS992188.1	18319	1.186e+05	0.43	0.0	99.98%	17892	23975	0.76	0.0	99,98%	intI1Δ|dfrA12|gcuF|aadA2|qacEΔ1|sul1|ISCR1|tat|trp|bleMBL|blaNDM-1	FII	Unknown	Unknown	NDM-1	-
Escherichia coli strain EC1188 plasmid pEC1188-NDM16, complete sequence	MH213345.1	18319	90586	0.4	0.0	99.98%	17892	24925	0.79	0.0	99,98%	intI1Δ|dfrA12|gcuF|aadA2|qacEΔ1|sul1|ISCR1|tat|trp|bleMBL|blaNDM-16	FII	China	Clinical (urine)	NDM-16	ST3204
Escherichia coli strain 1108 plasmid p1108-NDM, complete sequence	MG825381.1	18319	39485	0.14	0.0	99.98%	17892	44072	0.81	0.0	99,98%	intI1|dfrA12|gcuF|aadA2|qacEΔ1|sul1|ISCR1|tat|trp|bleMBL|blaNDM-1	N-R-X1	China	Food (chicken)	NDM-1	-
Klebsiella pneumoniae strain 185 plasmid pNDM-185, complete sequence	MH011352.1	18319	49873	0.13	0.0	99.98%	17892	50939	0.76	0.0	99,98%	intI1Δ|dfrA12|gcuF|aadA2|qacEΔ1|sul1|ISCR1|tat|trp|bleMBL|blaNDM-1	C	China	Sputum	NDM-1	-
Klebsiella pneumoniae strain QS17-0029 plasmid pMR0617ndm, complete sequence	CP024039.1	18319	1.310e+05	0.41	0.0	99.98%	17892	21052	0.76	0.0	99,98%	intI1|dfrA12|gcuF|aadA2|qacEΔ1|sul1|ISCR1|tat|trp|bleMBL|blaNDM-1	FIA-FIB-FII	Thailand	Unknown	NDM-1	-
Klebsiella pneumoniae strain FDAARGOS_440 plasmid unnamed1, complete sequence	CP023923.1	18319	1.586e+05	0.48	0.0	99.98%	17892	37299	0.84	0.0	99,98%	intI1|dfrA12|gcuF|aadA2|qacEΔ1|sul1|ISCR1|tat|trp|bleMBL|blaNDM-1	FIA-FIB-FII	Canada	Clinical (blood)	NDM-1	-
Escherichia coli plasmid pM214_FII DNA, complete genome, isolate: M214	AP018144.1	18319	1.183e+05	0.49	0.0	99.98%	17892	34368	0.84	0.0	99,98%	intI1Δ|dfrA12|gcuF|aadA2|qacEΔ1|sul1|ISCR1|tat|trp|bleMBL|blaNDM-5	FII	Myanmar	Clinical	NDM-5	ST354
Escherichia coli plasmid pM109_FII DNA, complete genome, isolate: M109	AP018139.1	18319	1.040e+05	0.42	0.0	99.98%	17892	30767	0.79	0.0	99,98%	intI1|dfrA12|gcuF|aadA2|qacEΔ1|sul1|ISCR1|dsbD|trp|bleMBL|blaNDM-4	FII	Myanmar	Clinical	NDM-4	ST405
Escherichia coli plasmid pM105_mF DNA, complete genome, isolate: M105	AP018137.1	18319	92871	0.29	0.0	99.98%	17892	37140	0.79	0.0	99,98%	intI1Δ|dfrA12|gcuF|aadA2|qacEΔ1|sul1|ISCR1|tat|trp|bleMBL|blaNDM-5	FIA-FIB-Q1	Myanmar	Clinical	NDM-5	ST405
Escherichia coli isolate Co6114 plasmid pC06114_1, complete sequence	CP016035.1	18319	1.554e+05	0.56	0.0	99.98%	17892	35327	0.84	0.0	99,98%	intI1|dfrA12|gcuF|aadA2|qacEΔ1|sul1|ISCR1|tat|trp|bleMBL|blaNDM-1	FIA-FIB-FII	Germany	Clinical	NDM-1	-
Klebsiella pneumoniae strain ST147 plasmid pCC1409-1, complete sequence	KT725789.1	18319	1.122e+05	0.48	0.0	99.98%	17890	28156	0.79	0.0	99,98%	intI1Δ|dfrA12|gcuF|aadA2|qacEΔ1|sul1|ISCR1|tat|trp|bleMBL|blaNDM-5	FII	Poland	Unknown	NDM-5	ST147
Klebsiella pneumoniae strain ST147 plasmid pCC1410-1, complete sequence	KT725788.1	18319	1.190e+05	0.49	0.0	99.98%	17890	34891	0.86	0.0	99,98%	intI1Δ|dfrA12|gcuF|aadA2|qacEΔ1|sul1|ISCR1|tat|trp|bleMBL|blaNDM-5	FII	Poland	Unknown	NDM-5	ST147
Escherichia coli strain MS6192 plasmid pMS6192A-NDM, complete sequence	CP054941.1	18314	1.100e+05	0.35	0.0	99.97%	17887	30368	0.76	0.0	99,97%	intI1|dfrA12|gcuF|aadA2|qacEΔ1|sul1|ISCR1|tat|trp|bleMBL|blaNDM-1	FIA-FIB-FII	India	Clinical (urine)	NDM-1	ST101
Escherichia coli strain MS6193 plasmid pMS6193A-NDM, complete sequence	CP047406.1	18314	1.168e+05	0.37	0.0	99.97%	17887	30368	0.76	0.0	99,97%	intI1|dfrA12|gcuF|aadA2|qacEΔ1|sul1|ISCR1|tat|trp|bleMBL|blaNDM-1	FIA-FIB-FII	India	Clinical (urine)	NDM-1	ST101
Escherichia coli strain IVRI Kol CP4 plasmid p1ESCUMpO83_CORR	CP034254.1	18312	96157	0.4	0.0	99.97%	17880	29888	0.79	0.0	99,97%	intI1Δ|dfrA12|gcuF|aadA2|qacEΔ1|sul1|ISCR1|tat|trp|bleMBL|blaNDM-5	FII	India	Mastitis Milk	NDM-5	-
Escherichia coli strain GUE plasmid pGUE-NDM, complete sequence	JQ364967.1	18308	1.021e+05	0.41	0.0	99.96%	17883	29874	0.76	0.0	99,96%	intI1|dfrA12|gcuF|aadA2|qacEΔ1|sul1|ISCR1|tatΔ|trp|bleMBL|blaNDM-1	FII	India	Skin	NDM-1	ST131
Citrobacter freundii plasmid pNDM-CIT, complete sequence	JX182975.1	18306	54839	0.13	0.0	99.96%	17880	35902	0.76	0.0	99,96%	intI1|dfrA12|gcuF|aadA2|qacEΔ1|sul1|ISCR1|tat|trp|bleMBL|blaNDM-1	HI1	India	Clinical (UTI)	NDM-1	-
Escherichia coli YJ4 plasmid pYJ4-NDM5 DNA, complete genome	AP023231.1	18305	98276	0.44	0.0	99.95%	17873	23925	0.76	0.0	99,95%	intI1Δ|dfrA12|gcuF|aadA2|qacEΔ1|sul1|ISCR1|tat|trp|bleMBL|blaNDM-5	FII	Myanmar	Human stool	NDM-5	-
Escherichia coli plasmid pNDM5-IBAC, complete sequence	KY463220.1	18297	1.313e+05	0.53	0.0	99.95%	17860	34100	0.83	0.0	99,94%	intI1Δ|dfrA12|gcuF|aadA2|qacEΔ1|sul1|ISCR1|tat|trp|bleMBL|blaNDM-5	FII	Italy	Clinical	NDM-5	ST405
Escherichia coli strain TAEC1 plasmid pNDM-TAEC1, complete sequence	MH001166.1	18268	41018	0.11	0.0	99.90%	17859	47930	0.76	0.0	99,90%	intI1Δ|dfrA12|gcuF|aadA2|qacEΔ1|sul1|ISCRΔ|tat|trp|bleMBL|blaNDM-1	C	Unknown	Unknown	NDM-1	-
Escherichia coli strain 38 plasmid p38_A-OXA140, complete sequence	CP048377.1	18185	56222	0.22	0.0	99.77%	17758	43137	0.76	0.0	99,76%	intI1Δ|dfrA12|gcuF|aadA2|qacEΔ1|sul1|ISCR1|tat|trp|bleMBL|blaNDM-5	FIA-FIB-FII	Switzerland	Environmental	NDM-5	-
Escherichia coli strain CRE1540 plasmid p1540-4, complete sequence	CP019055.1	18164	89428	0.31	0.0	96.30%
Escherichia coli strain Ec-050 plasmid pEc-050-NDM-5, complete sequence	CP043230.1	18041	76905	0.23	0.0	99.90%
Salmonella enterica subsp. enterica serovar Indiana strain SI108 plasmid pSI108-1, complete sequence	CP050770.1	17656	1.380e+05	0.51	0.0	99.83%
Salmonella enterica Serotypes Indiana strain GDD25-21 plasmid pGDD25-21,complete sequence	MH316136.1	17656	1.188e+05	0.48	0.0	99.83%
Salmonella enterica Serotypes Indiana strain GDD25-16 plasmid pGDD25-16,complete sequence	MH316135.1	17656	1.190e+05	0.48	0.0	99.83%
Salmonella enterica Serotypes Indiana strain GDD25-3 plasmid pGDD25-3,complete sequence	MH316133.1	17656	1.184e+05	0.48	0.0	99.83%
Escherichia coli strain Ecol_316 plasmid pEC316_3, complete sequence	CP018954.1	17555	1.042e+05	0.34	0.0	99.80%
