# Supplementary material for: Report and Comparative Genomics of an NDM-5-Producing Escherichia coli in a Portuguese Hospital: Complex Class 1 Integrons as Important Players in blaNDM Spread
Source: Microorganisms. 2022 Nov 12;10(11):2243. doi: 10.3390/microorganisms10112243 (PMC9693474; doi:10.3390/microorganisms10112243)
Supplement: Supplementary file 1 [file microorganisms-10-02243-s001.zip › Table S5.xlsx]

## Sheet: Table
Genome Name	GenBank Accessions	Metadata				Serotype	fimH type	Pathogen	ARGs confering resistance to																Integron arrays	NDM context	Virulence genes		Plasmid replicons
		Sample Type	Host Name	Isolation Country	Collection Date				Beta-lactams	Aminoglycosides	Colistin	Fosfomycin	Fusidic acid	Glycopeptides	Macrolides	Nitroimidazole	Oxazolidinone	Phenicols	Fluoroquinolones	Rifampicins	Sulphonamides	Tetracycline	Trimethoprim
Escherichia coli Ec355340	-	Urine; Clinical	Human	Portugal	2019	O54:H28	-38	Yes (0.934)	blaNDM-5, blaTEM-1B	aadA2	-	-	-	-	mdf(A), mph(A)	-	-	-	qepA4		sul1	tet(B)	dfrA12	9	intI1∆|qepA4|ISCR3|groEL|dfrA12|gcuF|aadA2|qacE∆1|sul1|ISCR1|tat|trp|bleMBL|blaNDM-5	Complex integron	fyuA, gad, irp2, iss, lpfA, papC, terC, traT	8	IncFIB, IncFII	2
Escherichia coli 174900	AQGI00000000	Feces; N/A	Human	Bangladesh	N/A	O132:H25	-38	Yes (0.936)	blaTEM-1B	-	-	-	-	-	mdf(A)	-	-	catA1	qepA4-like	-	sul1	-	dfrB4	6	intI1	-	astA, gad-like, iss, lpfA, terC, traT	6	IncFIA, IncI(Gamma)	2
Escherichia coli MP020940.1	AQEZ00000000	Feces; Clinical	Human	Bangladesh	N/A	O36:H5	-38	Yes (0.926)	blaTEM-1B	-	-	-	-	-	mdf(A)	-	-	-	-	-	-	tet(B)	-	3	-	-	astA, cba, cma, gad, hra, iss, lpfA, sitA, terC, traT	10	IncFIA, IncFII, IncI(Gamma)	3					NDM-1
Escherichia coli P0304816.1	AQEM00000000	Feces; N/A	Human	Bangladesh	N/A	O36:H5	-38	Yes (0.925)	blaTEM-1B	-	-	-	-	-	mdf(A)	-	-	-	-	-	-	tet(B)	-	3	-	-	astA, cba, cea, cia, cma, gad, hra, iss, lpfA, sitA, terC, traT	12	IncFIA, IncFII, IncI(Gamma)	3					NDM-5
Escherichia coli P0304816.6	AQBD00000000	Feces; N/A	Human	Bangladesh	N/A	O36:H5	-38	Yes (0.925)	blaTEM-1B	-	-	-	-	-	mdf(A)	-	-	-	-	-	-	tet(B)	-	3	-	-	astA, cba, cia, cma, gad, hra, iss, lpfA, terC, traT	10	IncFIA, IncFII, IncI(Gamma)	3					NDM-9
Escherichia coli P0304816.8	AQBF00000000	Feces; N/A	Human	Bangladesh	N/A	O36:H5	-38	Yes (0.922)	blaTEM-1B	-	-	-	-	-	mdf(A)	-	-	-	-	-	-	tet(B)	-	3	-	-	astA, cba, cia, cma, gad, hra, iss, lpfA, terC, traT	10	IncFIA, IncFII, IncI(Gamma)	3					NDM negative
Escherichia coli P0304816.11	AQAU00000000	Feces; N/A	Human	Bangladesh	N/A	O36:H5	-38	Yes (0.927)	blaTEM-1B	-	-	-	-	-	mdf(A)	-	-	-	-	-	-	tet(B)	-	3	-	-	astA, cba, cma, gad, hra, iss, lpfA, terC, traT	9	IncFIA, IncFII, IncI(Gamma)	3
Escherichia coli P0304816.12	AQAV00000000	N/A	Human	Bangladesh	N/A	O36:H5	-38	Yes (0.923)	blaTEM-1B	-	-	-	-	-	mdf(A)	-	-	-	-	-	-	tet(B)	-	3	-	-	astA, cba, cia, cma, gad, hra, iss, lpfA, terC, traT	10	IncFIA, IncFII, IncI(Gamma)	3
Escherichia coli P0304816.13	AQAW00000000	N/A	Human	Bangladesh	N/A	O36:H5	-38	Yes (0.922)	blaTEM-1B	-	-	-	-	-	mdf(A)	-	-	-	-	-	-	tet(B)	-	3	-	-	astA, cba, cia, cma, gad, hra, iss, lpfA, terC, traT	10	IncFIA, IncFII, IncI(Gamma)	3
Escherichia coli MGH 57	JMVP00000000	Wound abscess; Clinical	Human	USA	2013	O10:H28	-54	Yes (0.935)	blaTEM-1A	-	-	-	-	-	mdf(A)	-	-	-	-	-	-	-	-	2	-	-	gad, iss, lpfA, mcbA, terC, traT	6	Col-type, IncB/O/K/Z, IncFII, IncI1-I(Gamma), IncX1	5
Escherichia coli SE11	AP009240,AP009245,AP009246,AP009242,AP009243,AP009241,AP009244	Feces; Commensal	Human	N/A	N/A	O173:H28	-38	Yes (0.935)	-	-	-	-	-	-	mdf(A)	-	-	-	-	-	-	tet(C)	-	2	-	-	cia, gad, iss, lpfA, ompT, terC	6	IncFIB, IncFII, IncI1-I(Gamma) (ST14)	3
Escherichia coli strain 2772a	LCVG00000000	Udder; Clinical	Cow	Germany	2007	O174:H28	-38	Yes (0.942)	-	-	-	-	-	-	mdf(A)	-	-	-	-	-	-	-	-	1	-	-	gad-like, lpfA, terC, traT	4	IncFIA, IncFIB, IncFII	3
Escherichia coli strain BJ10	LWQZ00000000	Liver ascites; Clinical	Human	China	2015	H25	-38/-325	Yes (0.931)	blaNDM-5	aac(3)-Iid, aadA2, aph(3'')-Ib, aph(3')-Ia, aph(6)-Id	mcr-1.1	fosA3	-	-	mdf(A), mph(A)	-	-	floR	oqxA, oqxB	-	sul2	tet(A)	dfrA12	16	intI1|dfrA12|gcuF|aadA2	tat|trp|bleMBL|blaNDM-5	astA, cea, cib, cma, cvaC, gad-like, hlyF, iroN, iss, iucC, iutA, lpfA, ompT, papC, sitA, terC, traT	17	Col-type, IncFIB, IncFIC, IncFII, IncI1-I(Gamma) (ST26, CC-2), IncX3, IncY	7
Escherichia coli strain 454	MOFF00000000	Cloacal swabs; N/A	Chicken	China	2014	H30	-38	Yes (0.931)	blaCTX-M-65, blaNDM-9, blaTEM-1B	aac(3)-IV, aadA2, aadA22, aph(3')-Ia, aph(4)-Ia, rmtB	-	fosA3	-	-	erm(B), mdf(A), mph(A)	-	-	floR	-	-	sul1	tet(M)	dfrA12	17	intI|dfrA12|gcuF|aadA2|qacE∆1|sul1|ISCR1|tat|trp|bleMBL|blaNDM-9	Complex integron	astA, cba, cia, cma, etsC, hlyF, hra, iss, lpfA, ompT, papC, sitA, terC, traT	14	Col-type, IncFIB, IncFII	3	cutA
Escherichia coli strain 617	MOFJ00000000	Cloacal swabs; N/A	Chicken	China	2014	O81:H28	-38	Yes (0.933)	blaCTX-M-55, blaDHA-like, blaNDM-1	aac(3)-IV, aac(6')-Ib3, aadA16, aadA2, aadA5, aph(3'')-Ib, aph(3')-Ia, aph(4)-Ia, aph(6)-Id, rmtB	mcr-1.1	fosA3	-	-	mdf(A), mph(A)	-	-	catA1, catB3-like, floR	oqxA-like, oqxB	arr-3	sul1, sul2	tet(A)	dfrA12, dfrA17, dfrA27	29	intI|aac(6')-Ib3	trp|bleMBL|blaNDM-1|catB3-like|arr3|dfrA27|aadA16	astA, gad-like, hra, iss, lpfA, papA_F19, terC, traT	8	IncHI2 (ST3), IncI2, p0111-type	3
Escherichia coli strain 615	MOFK00000000	Cloacal swabs; N/A	Chicken	China	2014	O65:H28	-38	Yes (0.936)	blaCTX-M-55, blaNDM-1, blaTEM-1B	aac(6')-Ib3, aadA16, aadA2, aadA5, aph(3'')-Ib, aph(6)-Id, rmtB	mcr-1.1	fosA3	-	-	mdf(A), mph(A)	-	-	catA1, catB3-like, floR	oqxA-like, oqxB	arr-3	sul1, sul2	tet(A)	dfrA17, dfrA27	25	intI1	trp|bleMBL|blaNDM-1|catB3-like|arr3|dfrA27|aadA16	astA, gad-like, hra, iss, lpfA, papA_F19, terC	7	Col-like, IncHI2 (ST3), IncI2	3
Escherichia coli strain 678	MOFY00000000	Cloacal swabs; N/A	Chicken	China	2015	H25	-38/-325	Yes (0.934)	blaCMY-2, blaCTX-M-65, blaNDM-5, blaTEM-1B	rmtB	-	fosA3	-	-	mdf(A)	-	-	-	-	-	-	tet(B)	-	8	-	tat|trp|bleMBL|blaNDM-5	astA, cib, etsC, gad-like, hlyF, iroN, iss, iucC, iutA, lpfA, ompT, papC, sitA, terC, traT, tsh	16	IncFIB, IncFIC, IncFII, IncI1-I(Gamma) (ST12), IncX3	5
Escherichia coli strain 622	MOGC00000000	Cloacal swabs; N/A	Chicken	China	2015	H25	-38/-325	Yes (0.932)	blaCMY-2, blaCTX-M-65, blaNDM-5, blaTEM-1B	aac(3)-IV, aadA-like, aph(4)-Ia, rmtB	-	fosA3	-	-	mdf(A)	-	-	floR	-	arr-3-like	sul2	tet(A)-like, tet(B)	dfrA12	16	intI|dfrA12|gcuF|aadA-like	tat|trp|bleMBL|blaNDM-5	astA, cea, cib, etsC, gad-like, hlyF, iroN, iss, iucC, iutA, lpfA, ompT, papC, sitA, terC, traT, tsh	17	Col-type, IncFIB, IncFIC, IncFII, IncHI2-like, IncI1-I(Gamma) (ST12), IncX3	7
Escherichia coli strain 635	MOGJ00000000	Cloacal swabs; N/A	Chicken	China	2015	H28	-38	Yes (0.927)	blaCMY-2, blaNDM-9, blaOXA-1	aac(3)-IV, aac(6')-Ib-cr, aadA2, aadA5, aph(3'')-Ib, aph(3')-Ia, aph(4)-Ia, aph(6)-Id, rmtB	mcr-1.1	fosA3	-	-	mdf(A), mph(A)	-	-	catA1, catB3, floR	aac(6')-Ib-cr	arr-3	sul1, sul2	tet(A)	dfrA12, dfrA17	25	intI|dfrA17|aadA5; intI|dfrA12|gcuF|aadA2	tat|trp|bleMBL|blaNDM-9	astA, cia, gad-like, hra, iss, lpfA, papA_F19, terC, traT	9	Col-type, IncFII, IncHI2 (ST3), IncI1-I(Gamma) (ST2, CC-2), IncI2(Delta)	5
Escherichia coli strain 583	MOHA00000000	Cloacal swabs; N/A	Chicken	China	2015	H30	-38	Yes (0.925)	blaCMY-2, blaNDM-9, blaTEM-1B	aac(6')-Il, aadA-like, aadA2, aph(3'')-Ib, aph(3')-Ia, aph(6)-Id	-	fosA3	-	-	lnu(F), mdf(A), mph(A)	-	-	cmlA1, floR	-	-	sul1, sul2, sul3	tet(A)	dfrA12	20	intI1|dfrA12|aadA2	ISCR1|tat|trp|bleMBL|blaNDM-9	astA, cba, cea, cia-like, cma, etsC, gad-like, hlyF, hra, iss, lpfA, ompT, papC, sitA, terC, traT	16	Col-type, IncC (ST3), IncFIB, IncFII, IncI1-I(Gamma) (CC-2), p0111-type	6	cutA
Escherichia coli strain 629	MOHB00000000	Sewage; Environmental	-	China	2015	H28	-38	Yes (0.926)	blaCMY-140, blaCTX-M-55, blaNDM-1, blaTEM-1B	aadA16, aadA5, aph(3'')-Ib, aph(6)-Id, rmtB	mcr-1.1	fosA3	-	-	erm(B), mdf(A), mph(A)	-	-	catA1, catB3-like, floR	qepA1-like	arr-3	sul1, sul2	tet(A)	dfrA17, dfrA27	24	intI1	ISCR1|trp|bleMBL|blaNDM-1|catB3-like	astA, cib, gad-like, hra, iss, lpfA, papA_F19, terC	8	Col-type, IncI1-I(Gamma) (ST12), IncI2	3
Escherichia coli strain 574	MOHC00000000	Sewage; Environmental	-	China	2015	H10	-38	Yes (0.922)	blaCTX-M-65, blaNDM-9, blaTEM-like	aac(3)-IV, aac(6')-Ib3, aadA16, aadA2, aadA22, aph(3'')-Ib, aph(3')-Ia, aph(4)-Ia, aph(6)-Id	-	fosA3	-	-	erm(B), mdf(A), mph(A)	-	-	catA1, catB3, floR	-	arr-3	sul1, sul2	tet(A), tet(B), tet(M)	dfrA1, dfrA12, dfrA27	28	intI1	ISCR1|tat|trp|bleMBL|blaNDM-9	astA, cba, cia, cma, gad-like, hlyF, hra, iss-like, lpfA, ompT-like, papC, terC, traT-like	13	Col-type, IncC (ST3), IncFIB, IncFII, IncX1, IncX4, p0111-type	7	cutA
Escherichia coli strain 468	MOHE00000000	Sewage; Environmental	-	China	2015	O76:H45	-38	Yes (0.927)	blaCMY-2, blaCTX-M-55, blaNDM-9, blaTEM-1B	aac(3)-Iia, aadA12, aph(3')-Ia	-	fosA3	-	-	lnu(F), mdf(A), mph(A)	-	-	floR	-	-	sul1, sul3	tet(A)	dfrA12, dfrA14	17	intI1; intI|dfrA14; dfrA12|gcuF|aadA12|qacE∆1|sul1|ISCR1|tat|trp|bleMBL|blaNDM-9	Complex integron	astA, cea-like, cia, cma, cvaC, gad-like, hlyF, hra, iss, iucC, iutA, lpfA, ompT, papC, sitA, terC, traT	17	Col-type, IncFIB, IncFIC, IncFII, IncI1-I(Gamma) (CC-2)	5	cutA
Escherichia coli strain 467	MOHG00000000	Cloacal swabs; N/A	Chicken	China	2015	O61:H28	-38	Yes (0.934)	blaCTX-M-55, blaNDM-1	aac(6')-Ib3, aadA16, aadA2, aadA5, aph(3'')-Ib, aph(6)-Id, rmtB	mcr-1.1	fosA3	-	-	mdf(A), mph(A)	-	-	catA1, catB3-like, floR	qepA1	arr-3	sul1, sul2	tet(A)	dfrA17, dfrA27	23	intI; intI|aac(6')-Ib3; intI|dfrA17|aadA5	trp|bleMBL|blaNDM-1|catB3-like|arr3|dfrA27|aadA16	astA, gad-like, hra, iss, lpfA, neuC, papA_F19, terC	8	Col-type, IncHI2 (ST3), IncI2	3	mantenho estes integrões? Ints sao hits de cerca de 100 nt
Escherichia coli strain 466	MOHH00000000	Cloacal swabs; N/A	Chicken	China	2015	O81:H28	-38	Yes (0.934)	blaCTX-M-55, blaNDM-1	aac(3)-IV, aac(6')-Ib3, aadA16, aadA2, aadA5, aph(3'')-Ib, aph(3')-Ia, aph(4)-Ia, aph(6)-Id, rmtB	mcr-1.1	fosA3	-	-	mdf(A), mph(A)	-	-	catA1, catB3-like, floR	oqxA-like, oqxB	arr-3	sul1, sul2	tet(A)	dfrA12, dfrA17, dfrA27	28	intI1	trp|bleMBL|blaNDM-1|catB3-like|arr3|dfrA27|aadA16	astA, gad-like, hra, iss, lpfA, papA_F19, terC	7	Col-type, IncHI2 (ST3), IncI2, p0111-type	4
Escherichia coli strain 465	MOHI00000000	Cloacal swabs; N/A	Chicken	China	2015	O81:H28	-38	Yes (0.934)	blaCTX-M-55, blaNDM-1	aac(3)-IV, aac(6')-Ib3, aadA16, aadA2, aadA5, aph(3'')-Ib, aph(3')-Ia, aph(4)-Ia, aph(6)-Id, rmtB	mcr-1.1	fosA3	-	-	mdf(A), mph(A)	-	-	catA1, catB3-like, floR	oqxA-like, oqxB	arr-3	sul1, sul2	tet(A)	dfrA12, dfrA17, dfrA27	28	intI1; qacE∆1|sul1|ISCR1|trp|bleMBL|blaNDM-1|catB3-like|arr3|dfrA27|aadA16	Complex integron	astA, gad-like, hra, iss, lpfA, papA_F19, terC	7	Col-type, IncHI2 (ST3), IncI2, p0111-type	4
Escherichia coli strain 628	MOHJ00000000	Cloacal swabs; N/A	Chicken	China	2015	O81:H28	-38	Yes (0.934)	blaCTX-M-55, blaNDM-1	aac(3)-IV, aac(6')-Ib3, aadA16, aadA2, aadA5, aph(3'')-Ib, aph(3')-Ia, aph(4)-Ia, aph(6)-Id, rmtB	mcr-1.1	fosA3	-	-	mdf(A), mph(A)	-	-	catA1, catB3-like, floR	oqxA-like, oqxB	arr-3	sul1, sul2	tet(A)	dfrA12, dfrA17, dfrA27	28	intI; intI|aac(6')-Ib3; qacE∆1|sul1|ISCR1|trp|bleMBL|blaNDM-1|catB3-like|arr3|dfrA27|aadA16	Complex integron	astA, gad-like, hra, iss, lpfA, papA_F19, terC	7	Col-type, IncHI2 (ST3), IncI2, p0111-type	4
Escherichia coli strain 627	MOHK00000000	Cloacal swabs; N/A	Chicken	China	2015	O81:H28	-38	Yes (0.924)	blaCTX-M-55, blaNDM-1	aac(3)-IV, aac(6')-Ib3, aadA16, aadA2, aadA5, aph(3'')-Ib, aph(3')-Ia, aph(4)-Ia, aph(6)-Id, rmtB	mcr-1.1	fosA3	-	-	mdf(A), mph(A)	-	-	catA1, catB3-like, floR	oqxA-like, oqxB	arr-3	sul1, sul2	tet(A)	dfrA12, dfrA17, dfrA27	28	intI; intI|aac(6')-Ib3; qacE∆1|sul1|ISCR1|trp|bleMBL|blaNDM-1|catB3-like|arr3|dfrA27|aadA16	Complex integron	astA, cma, hlyF, hra, iss, lpfA, ompT-like, papA_F19, sitA, terC	10	Col-type, IncFIB, IncHI2 (ST3), IncI2, IncX4, IncY-like, p0111-type	7
Escherichia coli strain 464	MOHN00000000	Cloacal swabs; N/A	Chicken	China	2015	O81:H28	-38	Yes (0.934)	blaCTX-M-55, blaNDM-1	aac(3)-IV, aac(6')-Ib3, aadA16, aadA2, aadA5, aph(3'')-Ib, aph(3')-Ia, aph(4)-Ia, aph(6)-Id, rmtB	mcr-1.1	fosA3	-	-	mdf(A), mph(A)	-	-	catA1, catB3-like, floR	oqxA-like, oqxB	arr-3	sul1, sul2	tet(A)	dfrA12, dfrA17, dfrA27	28	intI1; qacE∆1|sul1|ISCR1|trp|bleMBL|blaNDM-1|catB3-like|arr3|dfrA27|aadA16	Complex integron	astA, gad-like, hra, iss, lpfA, papA_F19, terC	7	Col-type, IncHI2 (ST3), IncI2, p0111-type	4
Escherichia coli strain 620	MOFI00000000	Cloacal swabs; N/A	Chicken	China	2014	H30	-38	Yes (0.930)	blaCTX-M-65, blaNDM-9, blaTEM-1B	aac(3)-IV, aadA2, aadA22, aph(3')-Ia, aph(4)-Ia, rmtB	-	fosA3	-	-	erm(B), mdf(A), mph(A)	-	-	-	oqxA-like	-	sul1, sul2	tet(M)	dfrA12	18	intI; intI|aadA22; intI|dfrA12|gcuF|aadA2|qacE∆1|sul1|ISCR1|tat|trp|bleMBL|blaNDM-9	Complex integron	astA, cba, cea, cia, cma, etsC, gad-like, hlyF, hra, iss, iucC-like, kpsE-like, lpfA, ompT, papC, sitA, terC, traT	18	Col-type, IncFIB, IncFII	3	cutA
Escherichia coli strain 471	MOGX00000000	Cloacal swabs; N/A	Chicken	China	2015	H30	-38	Yes (0.924)	blaCMY-2, blaCTX-M-123, blaNDM-9, blaTEM-1B	aac(3)-IV, aac(6')-Il, aadA1, aadA2, aph(3'')-Ib, aph(4)-Ia, aph(6)-Id	-	fosA3	-	-	lnu(F), mdf(A), mph(A)	-	-	cmlA1, floR	-	-	sul1, sul2, sul3	tet(A)	dfrA12	22	intI1	ISCR1|tat|trp|bleMBL|blaNDM-9	astA, cba, cea, cia, cib, cma, etsC, gad-like, hlyF, hra, iha, ireA, iucC, iutA, lpfA, ompT, papC, sitA, terC, traT-like	20	Col-type, IncC (ST3), IncFIB, IncFII, IncI1-I(Gamma), p0111-type	6	cutA
Escherichia coli strain 599	MOGZ00000000	Cloacal swabs; N/A	Chicken	China	2015	H28	-38	Yes (0.926)	blaCMY-2, blaNDM-9, blaOXA-1	aac(3)-IV, aac(6')-Ib-cr, aadA2, aadA22, aadA5, aph(3'')-Ib, aph(3')-Ia, aph(4)-Ia, aph(6)-Id, rmtB	mcr-1.1	fosA3	-	-	erm(B), mdf(A), mph(A)	-	-	catA1, catB3, floR	aac(6')-Ib-cr, qepA1	arr-3	sul1, sul2	tet(A)	dfrA12, dfrA17	28	intI; intI|dfrA12|gcuF|aadA2; qacE∆1|sul1|ISCR1|tat|trp|bleMBL|blaNDM-9	Complex integron	astA, cia, gad-like, hra, iss, lpfA, papA_F19, terC, traT	9	Col-type, IncFII, IncHI2 (ST3), IncI1-I(Gamma) (ST2, CC-2), IncI2(Delta)	5	cutA
Escherichia coli strain 626	MOHL00000000	Cloacal swabs; N/A	Chicken	China	2015	O81:H28	-38	Yes (0.934)	blaCTX-M-55, blaNDM-1	aac(3)-IV, aac(6')-Ib3, aadA16, aadA2, aadA5, aph(3'')-Ib, aph(3')-Ia, aph(4)-Ia, aph(6)-Id, rmtB	mcr-1.1	fosA3	-	-	mdf(A), mph(A)	-	-	catA1, catB3-like, floR	oqxA-like, oqxB	arr-3	sul1, sul2	tet(A)	dfrA12, dfrA17, dfrA27	28	intI1	ISCR1|trp|bleMBL|blaNDM-1|catB3-like|arr3|dfrA27|aadA16	astA, gad-like, hra, iss, lpfA, papA_F19, terC	7	Col-type, IncHI2 (ST3), IncI2, p0111-type	4
Escherichia coli strain 544	MOHM00000000	Cloacal swabs; N/A	Chicken	China	2015	H28	-38	Yes (0.925)	blaCMY-2, blaNDM-9, blaOXA-1	aac(3)-IV, aac(6')-Ib-cr, aadA2, aadA22, aadA5, aph(3'')-Ib, aph(3')-Ia, aph(4)-Ia, aph(6)-Id, rmtB	mcr-1.1	fosA3	-	-	erm(B), mdf(A), mph(A)	-	-	catA1, catB3, floR	aac(6')-Ib-cr, qepA1	arr-3	sul1, sul2	tet(A)	dfrA12, dfrA17	28	intI	ISCR1|tat|trp|bleMBL|blaNDM-9	astA, cia, gad-like, hra, iss, lpfA, papA_F19, terC, traT	9	IncFII, IncHI2 (ST3), IncI1-I(Gamma) (ST2, CC-2), IncI2(Delta)	4	cutA
Escherichia coli strain 511	MOHV00000000	Cloacal swabs; N/A	Chicken	China	2015	H30	-38	Yes (0.932)	blaNDM-9, blaTEM-1B	aadA1, aadA2, aph(3')-Ia	-	fosA3	-	-	mdf(A), mph(A)	-	-	cmlA1, floR	-	-	sul1, sul3	tet(A)	dfrA12	14	intI1|dfrA12|gcuF|aadA2; qacE∆1|sul1|ISCR1|tat|trp|bleMBL|blaNDM-9	Complex integron	astA, cba, cia, cma, etsC, gad-like, hlyF, hra, iss, lpfA, ompT, papC, sitA, terC, traT-like	15	IncFIB, IncFII, p0111-type	3	cutA
Escherichia coli strain 504	MOHX00000000	Cloacal swabs; N/A	Chicken	China	2015	H30	-38	Yes (0.931)	blaNDM-9, blaTEM-1B	aadA1, aadA2, aph(3')-Ia	-	fosA3	-	-	mdf(A), mph(A)	-	-	cmlA1, floR	-	-	sul1, sul3	tet(A)	dfrA12	14	intI1|dfrA12|gcuF|aadA2; qacE∆1|sul1|ISCR1|tat|trp|bleMBL|blaNDM-9	Complex integron	astA, cba, cia, cma, etsC, gad-like, hlyF, hra, iss, lpfA, ompT, papC, sitA, terC, traT-like	15	IncFIB, IncFII, p0111-type	3	cutA
Escherichia coli strain 590	MOID00000000	Flies (chicken farms); N/A	Fly	China	2015	O118/151:H10	-38	Yes (0.925)	blaCTX-M-like, blaNDM-9	aac(3)-IV, aac(6')-Ib3, aadA2, aph(3'')-Ib, aph(4)-Ia, aph(6)-Id	-	fosA3	-	-	mdf(A), mph(A)	-	-	catA1, catB3, floR	-	-	sul1, sul2	tet(A), tet(B)	dfrA1, dfrA12	20	intI; intI|aac(6')-Ib3|catB3|dfrA1	ISCR1|tat|trp|bleMBL|blaNDM-9	astA, cba, cia, cma, etsC, hlyF, hra, iss, lpfA, ompT, papC, terC, traT-like	13	Col-type, IncC (ST3), IncFIB, IncFII, p0111-type	5	cutA
Escherichia coli strain 489	MOIN00000000	Flies (chicken farms); N/A	Fly	China	2015	H37	-38	Yes (0.936)	blaCTX-M-55, blaCTX-M-65-like, blaNDM-5, blaTEM-1B	aac(3)-IV, aadA1, aadA2, aph(3')-Ia, aph(4)-Ia, rmtB	mcr-1.1	fosA3	-	-	erm(B), mdf(A), mef(B), mph(A)	-	-	cmlA1	-	-	sul3	tet(A), tet(M)	dfrA12	20	intI1|dfrA12|gcuF|aadA2|cmlA1|aadA1|qacL|IS256|sul3	tat|trp|bleMBL|blaNDM-5	astA, gad, hra, iss, lpfA, papC, terC, traT	8	Col-like, IncFIA, IncFIB(K), IncFII, IncN, IncX3	6	cutA
Escherichia coli strain 648	MOJT00000000	Anal swab; N/A	Dog	China	2015	O81:H28	-38	Yes (0.934)	blaCTX-M-55, blaNDM-1	aac(3)-IV, aac(6')-Ib3, aadA16, aadA2, aadA5, aph(3'')-Ib, aph(3')-Ia, aph(4)-Ia, aph(6)-Id, rmtB	mcr-1.1	fosA3	-	-	mdf(A), mph(A)	-	-	catA1, catB3-like, floR	oqxA-like, oqxB	arr-3	sul1, sul2	tet(A)	dfrA12, dfrA17, dfrA27	28	intI1; ISCR|sul1|qacE∆1|aadA16|dfrA27|arr3|catB3-like|blaNDM-1|bleMBL|trp|ISCR	Complex integron	astA, gad-like, hra, iss, lpfA, papA_F19, terC	7	IncHI2 (ST3), IncI2, p0111-type	3
Escherichia coli strain 613	MOKK00000000	Cecum (slaughterhouse); N/A	Chicken	China	2015	O81:H28	-38	Yes (0.930)	blaCTX-M-55, blaNDM-1	aac(3)-IV, aac(6')-Ib3, aadA16, aadA2, aadA5, aph(3'')-Ib, aph(3')-Ia, aph(4)-Ia, aph(6)-Id, rmtB	mcr-1.1	fosA3	-	-	mdf(A), mph(A)	-	-	catA1, catB3-like, floR	oqxA-like, oqxB	arr-3	sul1, sul2	tet(A)	dfrA12, dfrA17, dfrA27	28	intI1; intI|aac(6')-Ib3	trp|bleMBL|blaNDM-1|catB3-like|arr3|dfrA27|aadA16	astA, gad-like, hra, iss, lpfA, papA_F19, terC	7	Col-type, IncHI2 (ST3), IncI1-I(Gamma), IncI2, p0111-type	5
Escherichia coli strain 571	MOJU00000000	Meat (chicken, supermarket); Environmental	-	China	2015	H28	-38	Yes (0.929)	blaNDM-9, blaTEM-1B	aac(3)-IId, aadA2, aph(3'')-Ib, aph(3')-IIa, aph(6)-Id, rmtB	mcr-1.1	-	-	-	mdf(A), mph(A)	-	-	floR	oqxA, oqxB	-	sul1, sul2	tet(A)	dfrA12	18	intI1|dfrA12|gcuF|aadA2|qacE∆1|sul1|ISCR1	tat|trp|bleMBL|blaNDM-9	astA, hra, lpfA, terC, traT-like	5	IncI2(Delta), IncX1	2	cutA
Escherichia coli strain 498	MOJE00000000	Flies (chicken farms); N/A	Fly	China	2015	O3:H25	-38	Yes (0.924)	blaCTX-M-123, blaNDM-5, blaTEM-1B	aac(3)-IV, aadA2, aph(3'')-Ib, aph(3')-Ia, aph(4)-Ia, aph(6)-Id	-	fosA3	-	-	mdf(A), mph(A)	-	-	floR	-	-	sul2	tet(B)	dfrA12	16	intI|dfrA12|gcuF|aadA2|IS91-like|nimC/A|bleMBL|IS6-like	tat|trp|bleMBL|blaNDM-5|IS5-like|IS30-like	astA, cib, hra, iss, lpfA, terC	6	Col-like, IncFIB(K), IncI1-I(Gamma) (ST108), IncX3, p0111-type	5	IncFIB not foun by pMLST		cutA
Escherichia coli strain 687	MOKM00000000	Cecum (slaughterhouse); N/A	Chicken	China	2015	O184:H28	-38	Yes (0.927)	blaCTX-M-55, blaNDM-1, blaOXA-1	aac(6')-Ib-cr, aadA16, aadA5, aph(3'')-Ib, aph(3')-Ia, aph(6)-Id, armA, rmtB	mcr-1.1	fosA3	-	-	erm(F)-like, mdf(A), mph(A), mph(E), msr(E)	-	-	catA1, floR	aac(6')-Ib-cr, qepA-like	arr-3	sul1, sul2	tet(A), tet(X)-like	dfrA17, dfrA27	28	intI|dfrA17|aadA5; intI|qepA-like	trp|bleMBL|blaNDM-1	gad-like, hra, iss, lpfA, papA_F19, terC	6	IncC (ST3), IncI1-I(Gamma), IncI2, p0111-type	4
Escherichia coli strain 656	MOKU00000000	Fecal swabs (chicken farms); N/A	Swallow	China	2015	O40:H25	-38	Yes (0.936)	blaCTX-M-65, blaNDM-1	aac(3)-IId, aac(6')-Ib-cr, aadA16, aph(3'')-Ib, aph(6)-Id	-	fosA3	-	-	mdf(A)	-	-	catB3-like, floR	aac(6')-Ib-cr	arr-3	sul1, sul2	tet(A)	dfrA27	16	intI1|aac(6')-Ib-cr; dfrA27|aadA16|qacE∆1|sul1|ISCR1|trp|bleMBL|blaNDM-1|catB3-like	Complex integron	gad-like, hra, iss, lpfA, papA_F19, terC	6	IncHI2, IncX1, IncY	3
Escherichia coli strain 724	MOKX00000000	Cloacal swabs; N/A	Chicken	China	2014	O177:H25	-38	Yes (0.928)	blaCTX-M-123, blaOXA-1, blaTEM-1B	aac(3)-IV, aac(6')-Ib-cr, aadA1, aadA2b, aadA5, aph(3'')-Ib, aph(4)-Ia, aph(6)-Id	mcr-1.1	fosA3	-	-	erm(B), mdf(A), mph(A)	-	-	catB3, cmlA1, floR	aac(6')-Ib-cr, oqxA, oqxB	arr-3	sul1, sul2, sul3	tet(A), tet(M)	dfrA17	28	intI1	-	astA, cea, cib, cma, cvaC, etsC, gad, hlyF, iroN, iss, iucC, iutA, lpfA, ompT, sitA, terC, traT	17	Col-type, IncFIA-like, IncFIB, IncFIC, IncFII, IncI1-I(Gamma) (ST108), IncI2, IncY	8
Escherichia coli strain 723	MOLE00000000	Cloacal swabs; N/A	Chicken	China	2015	O177:H25	-38	Yes (0.936)	blaCTX-M-65, blaOXA-1, blaTEM-1B	aac(3)-IId, aac(3)-IV, aac(6')-Ib-cr, aadA1, aadA2-like, aph(3')-Ia, aph(4)-Ia	mcr-1.1	fosA3	-	-	mdf(A), mph(A)	-	-	catB3, cmlA1, floR	aac(6')-Ib-cr, oqxA, oqxB	arr-3	sul1, sul2, sul3	tet(A)	dfrA12	25	intI1|estX|psp|aadA-like; intI|dfrA12|gcuF|aadA-like	-	astA, cba, cia-like, cib, cma, cvaC, etsC, gad-like, hlyF, iroN, iss, iucC, iutA, lpfA, mchF, ompT, sitA, terC, traT, tsh	20	Col-type, IncFIB, IncFIC, IncFII, IncI1-I(Gamma) (ST26, CC-2), IncI2(Delta), p0111-type	7	pouca seq, considero?
Escherichia coli strain HC891/2016	MRDN00000000	Blood; Clinical	Human	Brazil	2016	O142:H28	-38	Yes (0.926)	blaTEM-1B	aac(6')-Ib3, aph(3'')-Ib, aph(6)-Id	mcr-1.1	-	-	-	mdf(A)	-	-	catA1, catB3	-	-	sul1, sul2	tet(B)	dfrA1, dfrA14	13	intI1; intI|dfrA14|IS6-like; intI|aac(6')-Ib3|catB3|dfrA1|qacE∆1|sul1	-	cea, cma, cvaC, etsC, gad, hlyF, hra, iroN, iss, iucC, iutA, lpfA, mchF, ompT, papC, sitA, terC, traT	18	IncFIA-like, IncFIB, IncFII, IncX3, IncX4, IncY	6
Escherichia coli strain CT48C.C2	FLZA00000000	Feces; N/A	Chicken	Vietnam	2012	O76:H45	-38	Yes (0.931)	blaCTX-M-55, blaTEM-1B	aadA22, aph(3')-Ia	mcr-1.1	-	-	-	lnu(F), mdf(A)	-	-	-	-	-	-	tet(A)	-	8	intI|aadA22|lnu(F)	-	astA, cma, gad-like, hlyF, hra, iss, iucC, iutA, lpfA, ompT, papC, sitA, terC, traT	14	IncFIB, IncFIC, IncFII, IncX4	4
Escherichia coli strain MT50C.C1	FLZC00000000	Feces; N/A	Chicken	Vietnam	2012	O76:H45	-38	Yes (0.931)	blaCTX-M-55, blaTEM-1B	aac(3)-IIa, aadA-like, aph(3')-Ia	mcr-1.1	-	-	-	lnu(F), mdf(A)	-	-	floR	-	-	sul3	tet(A)	dfrA14	12	intI	-	astA, cma, cvaC, gad-like, hlyF, hra, iss, iucC, iutA, lpfA, ompT, papC, sitA, terC, traT	15	IncFIB, IncFIC, IncFII	3
Escherichia coli strain CG40C.C2	FLZK00000000	Feces; N/A	Chicken	Vietnam	2012	O76:H45	-38	Yes (0.930)	blaCTX-M-55, blaTEM-1B	aac(3)-IIa-like, aadA-like, aph(3')-Ia	mcr-1.1	-	-	-	lnu(F), mdf(A)	-	-	floR			sul3	tet(A)	dfrA14	12	intI	-	astA, cma, cvaC, gad-like, hlyF, hra, iss, iucC, iutA, lpfA, ompT, papC, sitA, terC, traT	15	IncFIB, IncFIC, IncFII, IncI2(Delta)	4
Escherichia coli strain CG10C.C1	FLZL00000000	Feces; N/A	Chicken	Vietnam	2012	O76:H45	-38	Yes (0.931)	blaCTX-M-55, blaTEM-1B	aac(3)-IIa, aadA2, aadA22, aph(3'')-Ib, aph(3')-Ia, aph(6)-Id	mcr-1.1	-	-	-	lnu(F), mdf(A), mph(A)	-	-	catA2	-	-	sul1, sul2, sul3	tet(A)	dfrA12, dfrA14	19	intI	-	astA, cma, cvaC, gad-like, hlyF, hra, iss, iucC, iutA, lpfA, ompT, papC, sitA, terC, traT	15	IncFIB, IncFIC, IncFII, IncHI2 (ST3), IncN, IncX4	6
Escherichia coli strain CT48C.C1	FLYS00000000	Feces; N/A	Chicken	Vietnam	2012	O76:H45	-38	Yes (0.932)	blaCTX-M-55, blaTEM-1B	aac(3)-IIa, aadA-like, aph(3')-Ia	mcr-1.1	-	-	-	lnu(F), mdf(A)	-	-	floR	-	-	sul3	tet(A)	dfrA14	12	intI	-	astA, cma, cvaC, gad-like, hlyF, hra, iss, iucC, iutA, lpfA, ompT, papC, sitA, terC, traT	15	IncFIB, IncFIC, IncFII	3
Escherichia coli strain WCHEC22/SCEC020022	NGVG00000000	N/A	Human	China	2016	H25	-38/-325	Yes (0.934)	blaCTX-M-14b, blaNDM-5, blaTEM-1B	aac(6')-Ib-cr, aadA16, aph(3'')-Ib, aph(6)-Id	mcr-1.1	fosA3	-	-	mdf(A)	-	-	floR	aac(6')-Ib-cr	arr-3	sul1, sul2	tet(A)	dfrA27	16	intI1|aac(6')-Ib-cr|arr3|dfrA27|aadA16|qacE∆1|sul1|ISCR1|blaCTX-M-14	tat|trp|bleMBL|blaNDM-5	astA, cea, gad-like, hlyF, iss, iucC, iutA, lpfA, ompT, papC, sitA, terC, traT	13	Col-type, IncFIB, IncFIC, IncFII, IncI1-I(Gamma), IncX3, IncY	7	cutA
Escherichia coli strain E24	MVOT00000000	Soil; Environmental	-	China	2016	H25	-38/-325	Yes (0.928)	blaCTX-M-14, blaTEM-1B	aac(3)-IV, aac(6')-Ib3, aadA1, aadA2b, aph(3')-Ia, aph(4)-Ia	mcr-1.1	fosA3	-	-	mdf(A), mph(A)	-	-	catA1, catB3, cmlA1, floR	-	-	sul1, sul2, sul3	tet(B), tet(M)	dfrA1	22	intI	-	hra, iss, lpfA, terC	4	IncHI2, IncN, IncX1	3
Escherichia coli strain CoR-1	MKFK00000000	Blood; Clinical	Human	China	2014	O130:H45	-	Yes (0.933)	blaCTX-M-55, blaOXA-10	aadA1, aph(3')-IIa, aph(3')-Ia	mcr-1.1	-	-	-	mdf(A)	-	-	cmlA1, floR	oqxA, oqxB	arr-2	sul2	tet(A)	dfrA14	15	intI|arr2|cmlA1|blaOXA-10|aadA1	-	astA, cma, cvaC, hlyF, hra, iss, iucC, iutA, lpfA, ompT, papC, sitA, terC, traT	14	Col-type, IncFIB, IncFIC, IncFII, IncI2(Delta), IncX1, p0111-type	7
Escherichia coli strain 157-1949	KZ269666,KZ269667,KZ269668,KZ269669,KZ269670,KZ269671	Urine; N/A	N/A	USA	N/A	O173:H28	-38	Yes (0.941)	-	-	-	-	-	-	mdf(A)	-	-	-	-	-	-	-	-	1	-	-	gad, iss, lpfA, terC	4	-	0
Escherichia coli strain MOD1-EC5693	NLHS00000000	Feces; N/A	Deer	USA	1981	H27	-38	Yes (0.934)	-	aph(3'')-Ib, aph(6)-Id	-	-	-	-	mdf(A)	-	-	-	-	-	sul2	tet(B)	-	5	-	-	f17A, f17G, gad, hra, iroN-like, lpfA, terC, traT	8	IncY	1
Escherichia coli strain MOD1-EC5340	NOEH01000000	Food (chicken); Environmental	-	Mexico	2002	O159:H28	-38	Yes (0.923)	blaTEM-1B	aac(6')-Ib3, aph(3'')-Ib, aph(6)-Id	-	-	-	-	mdf(A)	-	-	catA1, catB3	-	-	sul1, sul2	tet(A), tet(B)	dfrA1, dfrA14	13	intI1	-	cea, cma, cvaC, etsC, gad-like, hlyF, hra, iroN, iss, iucC, iutA, lpfA, mchF, ompT, sitA, terC, traT	17	Col-type, IncFIA-like, IncFIB, IncFII, IncI1-I(Gamma) (ST12), IncN, IncX1	7
Escherichia coli strain MOD1-EC6498	NLWP01000000	Small intestine; N/A	Dog	USA	1989	O99:H12	-38	Yes ( 0.941)	-	-	-	-	-	-	mdf(A)	-	-	-	-	-	-	-	-	1	-	-	f17A, f17G, gad-like, hra, iroN-like, lpfA, terC	7	Col-type	1
Escherichia coli strain MOD1-EC5335	NOEJ01000000	Feces; N/A	Human	Mexico	2002	O49:H19	-38	Yes (0.927)	blaTEM-1B	aac(6')-Ib3	-	-	-	-	mdf(A)	-	-	catA1, catB3	-	-	sul1	tet(A), tet(B)	dfrA1	9	intI1|aac(6')-Ib3|catB3|dfrA1|qacE∆1|sul1	-	gad-like, hra, iss, lpfA, terC	5	IncI1-I(Gamma), IncN, IncX1, p0111-type	4
Escherichia coli strain MOD1-EC5871	NOAB01000000	Feces; N/A	Cow	USA	1985	O99:H12	-38	Yes (0.938)	-	aph(3')-Ia	-	-	-	-	mdf(A)	-	-	-	-	-	-	-	-	2	-	-	f17A, f17G, gad-like, hra, iroN-like, lpfA, terC, traT	8	IncFII	1	hra? FIC?
Escherichia coli strain UFU_EC98	CP024092,CP024093,CP024094,CP024095	Urine; Clinical	Human	Brazil	2014	O142:H30	-38	Yes (0.928)	blaTEM-1B	aac(6')-Ib3, aph(3'')-Ib, aph(6)-Id	-	-	-	-	mdf(A)	-	-	catA1, catB3	-	-	sul1, sul2, sul3	tet(B)	dfrA1	12	aac(6')-Ib3|catB3|dfrA1|qacE∆1|sul1	-	astA, gad, hra, iss, lpfA, papC, terC	7	IncI1-I(Gamma), IncQ1-like	2
Escherichia coli strain MOD1-EC5332	NOEL01000000	Food (chicken); Environmental	-	Mexico	2002	O115:H51	-38	Yes (0.918)	blaTEM-1B	aac(6')-Ib3, aph(3'')-Ib, aph(6)-Id	-	-	-	-	mdf(A)	-	-	catA1, catB3	-	-	sul1	tet(B)	dfrA1	10	intI1|aac(6')-Ib3|catB3|dfrA1|qacE∆1|sul1	-	cma, etsC, gad-like, hlyF, hra, iroN, iss, iucC, iutA, lpfA, ompT, sitA, terC, traT, tsh	15	Col-type, IncFIB, IncFIC, IncFII, IncI1-I(Gamma) (ST202, CC-2), p0111-type	6
Escherichia coli strain MOD1-EC6972	NONB01000000	Feces; N/A	Bontebok	USA	1998	O49:H25	-38	Yes (0.938)	-	-	-	-	-	-	mdf(A)	-	-	-	-	-	-	-	-	1	-	-	etpD, fim41a, gad-like, hra, lpfA, terC	6	IncFII	1
Escherichia coli strain N36158PS	562.26295	Feces; N/A	Cattle	USA	2011	O8/160:H16	-38	Yes (0.933)	blaTEM-1B	aac(6')-Ib3	-	-	-	-	mdf(A)	-	-	catA1, catB3, floR	-	-	sul1, sul2	tet(B)	dfrA1	10	intI1|aac(6')-Ib3|catB3|dfrA1|qacE∆1|sul1	-	f17A, gad-like, hra, iroN-like, iss, lpfA, papC-like, terC	8	-	0
Escherichia coli strain N38733PS	562.26313	Feces; N/A	Cattle	USA	2011	O23:H28	-38	Yes (0.935)	blaTEM-1B	-	-	-	-	-	mdf(A)	-	-	floR	-	-	sul1, sul2	-	dfrA1	6	-	-	gad-like, hra, iss, lpfA, papC-like, terC	6	IncY	1
Escherichia coli strain CRE1540	CP019051,CP019052,CP019053,CP019054,CP019055	Rectal Swab; N/A	Human	China	2014	O35:H28	-38	Yes (0.936)	blaCTX-M-55, blaNDM-1, blaTEM-1B	aac(3)-IId, aac(3)-IV, aac(6')-Ib-cr, aadA16, aadA2, aadA5, aph(3'')-Ib, aph(3')-Ia, aph(4)-Ia, aph(6)-Id, rmtB	mcr-1.1	fosA3	-	-	mdf(A), mph(A)	-	-	catA1, catB3-like, floR	aac(6')-Ib-cr, qepA1	arr-3	sul1, sul2	tet(A)	dfrA12, dfrA17, dfrA27	29	intI1|dfrA12|gcuF|aadA2|qacE∆1|sul1; intI1|dfrA17|aadA5|qacE∆1|sul1; intI1|aac(6')-Ib-cr|arr3|dfrA27|aadA16|qacE∆1|sul1|ISCR1|trp|bleMBL|blaNDM-1|IS30-like|catB3|arr3|qacE∆1|sul1	Complex integron	cvaC, etsC, gad, hlyF, hra, iroN, iss, iucC, iutA, lpfA, mchF, ompT, papA_F19, sitA, terC, traT, tsh	17	IncC (ST3), IncFIA-like, IncFIB, IncFIC, IncFII, IncI2, p0111-type	7
Escherichia coli strain YH17178	PTML01000000	Cecal content; Clinical	Chicken	China	2016	O28ab:H45	-38	Yes (0.924)	blaTEM-1B	aac(3)-IId, aac(3)-IV, aph(3')-Ia, aph(4)-Ia	mcr-1.1	-	-	-	lnu(F), mdf(A)	-	-	cmlA1, floR	oqxA, oqxB, qnrS1	-	sul2, sul3	tet(B), tet(M)-like	dfrA12	18	intI	-	cea, fyuA, gad-like, hra, irp2, iss, lpfA, terC, traT	9	IncFIA, IncFIB, IncFIC, IncFII, IncHI1, IncX1	6
Escherichia coli strain YH17144	PTNN01000000	Cecal content; Clinical	Chicken	China	2016	H28	-38/-276/-274	Yes (0.928)	blaCTX-M-27, blaOXA-1	aac(3)-IV, aac(6')-Ib-cr, aadA-like, aadA22, aph(3'')-Ib, aph(3')-Ia, aph(4)-Ia, aph(6)-Id	mcr-1.1	-	-	-	mdf(A)	-	-	catB3, floR	aac(6')-Ib-cr, oqxA, oqxB	arr-3	sul1, sul2, sul3	tet(A)	dfrA12	22	intI; intI|aadA22; intI∆|dfrA12|gcuF||aadA-like	-	cea, cma, cvaC, etsC, hlyF, iroN, iss, iucC, iutA, lpfA, mchF, ompT, sitA, terC, traT	15	IncFIA-like, IncFIB, IncFIC, IncFII, IncHI2, IncI1-I(Gamma) (ST80, CC-31), IncX1	7
Escherichia coli strain AR_0374	CP027126,CP027128,CP027127,CP027125	N/A	N/A	N/A	N/A	H9	-38	Yes (0.930)	blaCMY-2, blaTEM-1B	aac(6')-Ib3	-	-	-	-	mdf(A)	-	-	catA1, catB3	-	-	sul1	tet(B)	dfrA1	9	intI1|aac(6')-Ib3|catB3|dfrA1|qacE∆1|sul1	-	cib, fyuA, gad, hra, irp2, iss, lpfA, sitA, terC	9	IncI1-I(Gamma) (ST12)	1
Escherichia coli strain HDC9	PGJF01000000	Cloacal swabs; N/A	Chicken	China	2004	O8/160:H45	-38	Yes (0.940)	blaTEM-1B	aac(3)-IIa, aac(6')-Ib3, aph(3'')-Ib, aph(6)-Id	-	-	-	-	mdf(A)	-	-	catA1, catB3	oqxA, oqxB	-	sul1	tet(A)	dfrA1	13	intI1|aac(6')-Ib3|catB3|dfrA1|qacE∆1|sul1	-	cea, gad-like, hra, lpfA, papC, terC	6	IncHI2, IncX1-like	2
Escherichia coli strain 8-2	PGKG01000000	Cloacal swabs; N/A	Chicken	China	2014	O177:H25	-38	Yes (0.934)	blaCTX-M-65, blaOXA-1, blaOXA-10, blaTEM-like	aac(3)-IId, aac(3)-IV, aac(6')-Ib-cr, aadA5, aph(3')-Ia, aph(4)-Ia	mcr-1.1	fosA3	-	-	mdf(A), mph(A)	-	-	catB3, cmlA1, floR	aac(6')-Ib-cr, oqxA, oqxB, qnrS1	-	sul1, sul2, sul3	-	dfrA12, dfrA17	25	intI1; intI∆|dfrA12|gcuF|aadA-like	-	cba, cea, cia-like, cib, cma, cvaC, etsC, gad-like, hlyF, iroN, iss, iucC, iutA, lpfA, mchF, ompT, sitA, terC, traT, tsh	20	IncFIB, IncFIC, IncFII, IncHI2 (ST3), IncI1-I(Gamma) (ST26, CC-2), IncI2(Delta), IncY	7
Escherichia coli strain sc12-98	PGKX01000000	Cloacal swabs; N/A	Chicken	China	2012	O174:H28	-38	Yes (0.936)	blaCTX-M-55, blaTEM-1B	-	mcr-1.1	fosA3	-	-	mdf(A)	-	-	-	-	-	-	-	-	5	-	-	astA, gad-like, hra, iss, lpfA, terC, traT	7	Col-type, IncFII, IncI2, IncN	4
Escherichia coli strain sc12-97	PGLA01000000	Cloacal swabs; N/A	Chicken	China	2012	O174:H28	-38	Yes (0.931)	blaCTX-M-55, blaTEM-like	aadA1, aadA2, aph(3'')-Ib, aph(3')-Ia, rmtB	mcr-1.1	fosA3	-	-	mdf(A), mef(B)	-	-	cmlA1, floR	oqxA, oqxB	-	sul3	tet(A)	dfrA12	18	intI	-	astA, cea-like, gad-like, hra, iss, lpfA, terC, traT	8	Col-type, IncFIA, IncFIB(K), IncFII, IncI2(Delta), IncN-like	6
Escherichia coli strain ECCRA-119	CP029242,CP029243,CP029244,CP029245	Feces; N/A	Chicken	China	2017	H25	-38/-325	Yes (0.933)	blaCTX-M-65, blaNDM-5, blaTEM-1B	aac(3)-IV, aadA2, aadA-like, aph(3')-Ia, aph(4)-Ia	-	fosA3	-	-	mdf(A), mph(A)	-	-	floR	-	-	sul1, sul2	tet(A), tet(B)	dfrA12	17	intI1|dfrA12|gcuF|aadA2|qacE∆1|sul1; intI∆|dfrA12|gcuF|aadA-like|IS6-like	IS6-like|tat|trp|bleMBL|blaNDM-5|IS5-like|IS30-like	cma, cvaC, gad, hlyF, iroN, iss, lpfA, ompT, papC, sitA, terC, traT	12	IncFIB, IncFII, IncN, IncX3, p0111-type	5	pMLST detetou um incFIC mas com baixa coverage				cutA
Escherichia coli strain AR436	CP029111,CP029109,CP029110,CP029112	N/A	N/A	N/A	N/A	H9	-38	Yes (0.931)	blaCMY-2, blaTEM-1B	aac(6')-Ib3	-	-	-	-	mdf(A)	-	-	catA1, catB3	-	-	sul1	tet(B)	dfrA1	9	intI1|aac(6')-Ib3|catB3|dfrA1|qacE∆1|sul1	-	cib, fyuA, gad, hra, irp2, iss, lpfA, sitA, terC	9	IncI1-I(Gamma)	1
Escherichia coli strain AR_452	CP030331,CP030329,CP030332,CP030330	N/A	Human	N/A	N/A	O54:H28	-38	Yes (0.935)	blaNDM-5, blaTEM-1B	aadA2	-	-	-	-	mdf(A), mph(A)	-	-	-	qepA4	-	sul1	tet(B)	dfrA12	9	intI1∆|qepA4|ISCR3|groEL|dfrA12|gcuF|aadA2|qacE∆1|sul1|ISCR1|tat|trp|bleMBL|blaNDM-5	Complex integron	fyuA, gad, irp2, iss, lpfA, papC, terC, traT	8	IncFIB, IncFII	2
Escherichia coli strain A60	NSAL01000000	Feces; Commensal	Human	China	2016	O130:H45	-38	Yes (0.933)	blaCTX-M-14, blaTEM-1B	aac(3)-IV, aadA1, aadA2-like, aph(3')-Ia, aph(4)-Ia	mcr-1.1	fosA3	-	-	mdf(A), mef(B)	-	-	cmlA1, floR	oqxA, oqxB	-	sul1, sul2, sul3	tet(B)	dfrA12	20	intI; intI∆|dfrA12|gcuF|aadA-like	-	gad-like, hra, iss, lpfA, papC, terC	6	IncFIA, IncFIB(K), IncHI2 (ST3)	3
Escherichia coli strain A35	NSAP01000000	Feces; Commensal	Human	China	2016	O174:H28	-38	Yes (0.941)	blaTEM-like	aadA5, aph(3'')-Ib, aph(3')-Ia, aph(6)-Id	mcr-1.1	-	-	-	mdf(A), mph(A)	-	-	floR	-	-	sul1, sul2	tet(A)	dfrA17	13	intI1|dfrA17|aadA5|qacE∆1|sul1	-	gad-like, hra, iss, lpfA, papA_F19, terC	6	Col-like	1
Escherichia coli strain A209	NSAS01000000	Feces; Commensal	Human	China	2016	O177:H25	-38	Yes (0.925)	blaCTX-M-55, blaOXA-1, blaTEM-1B	aac(3)-IId, aac(3)-IV, aac(6')-Ib-cr, aadA22, aph(3')-Ia, aph(4)-Ia	mcr-1.1	-	-	-	mdf(A)	-	-	catB3, floR	aac(6')-Ib-cr, oqxA, oqxB	arr-3	sul1, sul2	tet(A)	dfrA14, dfrA17	21	intI1	-	astA, cma, cvaC, gad-like, hlyF, hra, iss, iucC, iutA, lpfA, ompT, sitA, terC, traT	14	Col-type, IncFIB, IncFIC, IncFII, IncI1-I(Gamma) (ST80, CC-31), IncI2(Delta), IncY	7
Escherichia coli strain VREC0297	UCWP01000000	Feces; N/A	Pig	UK	2014	O174:H28	-38	Yes (0.935)	blaTEM-1B	aac(3)-IV, aadA2, aph(3'')-Ib, aph(4)-Ia, aph(6)-Id	-	-	-	-	mdf(A), mef(B)	-	-	floR	-	-	sul1, sul3	tet(B)	dfrA12	13	intI∆|dfrA12|gcuF|aadA2|qacE∆1|sul1	-	astA, cea, gad, hra, iss, lpfA, mcmA, papC-like, terC	9	IncFIA-like, IncFIB(K), IncX1	3
Escherichia coli strain VREC0601	UDAI01000000	Feces; N/A	Turkey	UK	2015	O100:H28	-38	Yes (0.936)	blaTEM-1B	aadA1-like, aph(3'')-Ib, aph(6)-Id	-	-	-	-	lnu(F), mdf(A)	-	-	-	-	-	-	tet(A)	-	7	-	-	cba, cea, cia-like, cma, cvaC, etsC, gad, hlyF, iroN, iss, iucC, iutA, lpfA, ompT, sitA, terC, traT	17	IncFIB, IncFIC, IncFII, IncX1, p0111-type	5
Escherichia coli strain VREC0575	UDAR01000000	Feces; N/A	Turkey	UK	2015	O76:H31	-38	Yes (0.934)	blaTEM-1B	aac(6')-Ib3	-	-	-	-	mdf(A)	-	-	catA1-like, catB3	-	-	sul1	tet(B)	dfrA1	8	intI1|aac(6')-Ib3|catB3|dfrA1|qacE∆1|sul1	-	gad, hra, iss, lpfA, terC	5	-	0
Escherichia coli strain TVS 353	PDAC01000000	Irrigation water; Environmental	-	USA	N/A	O88:H25	-38	Yes (0.938)	-	-	-	-	-	-	mdf(A)	-	-	-	-	-	-	-	-	1	-	-	gad-like, iss, lpfA, ompT, terC, traT	6	IncFIB, IncFII	2
Escherichia coli strain BA3358	RCAJ01000000	Blood; Clinical	Human	India	2017	O174:H28	-24	Yes (0.936)	blaNDM-5, blaTEM-1B	aadA2, rmtB	-	-	-	-	erm(B), mdf(A), mph(A)	-	-	-	-	-	sul1	-	dfrA12	9	intI1∆|dfrA12|gcuF|aadA2|qacE∆1|sul1|ISCR1|tat|trp|bleMBL|blaNDM-5	Complex integron	gad-like, iss, lpfA, terC, traT	5	IncFIA, IncFIB, IncFII-like	3	cutA
Escherichia coli strain B8110	RCAL01000000	Blood; Clinical	Human	India	2007	O40:H10	-38	Yes (0.930)	blaCTX-M-15, blaOXA-9, blaSHV-12, blaTEM-1B	aac(3)-IId, aac(6')-Ib3, aadA1	-	-	-	-	mdf(A)	-	-	catA1, catB3	-	-	sul1	tet(B)	dfrA1	13	intI1	-	celb, gad-like, hra, iss, lpfA, terC	6	Col-type, IncC, IncI1-I(Gamma)	3
Escherichia coli strain A102	RCHK01000000	Rectal swab; N/A	Giant anteater	Brazil	2017	H25	-38/-325	Yes (0.929)	blaCTX-M-65, blaTEM-1A	aac(3)-IV, aadA1, aadA2-like, aph(3'')-Ib, aph(4)-Ia, aph(6)-Id	-	-	-	-	mdf(A)	-	-	cmlA1, floR	-	-	sul2, sul3	tet(B)	dfrA12, dfrA8	16	intI1|estX|psp|aadA-like; intI∆|dfrA12|gcuF|aadA-like	-	gad-like, iss, lpfA, papC, terC	5	IncFIA, IncHI1 (ST5)	2
Escherichia coli strain CFRA112	RDCW01000000	Feces; N/A	Chicken	China	2017	O159:H28	-38	Yes (0.922)	blaCTX-M-199, blaTEM-like	aac(3)-IV, aadA2, aadA5, aph(3'')-Ib, aph(3')-Ia, aph(4)-Ia, aph(6)-Id, rmtB	mcr-1.1	fosA3	-	-	mdf(A), mph(A)	-	-	catA1, floR	qepA-like	-	sul1, sul2	tet(A)	dfrA12, dfrA17	22	intI; intI|qepA-like; dfrA12|gcuF|aadA2|qacE∆1|sul1	-	cma, etsC, hlyF, hra, iroN, iss, iucC, iutA, lpfA, ompT, papA_F19, sitA, terC, traT, tsh	15	Col-type, IncFIB, IncFIC, IncFII, IncI2, p0111-type	6
Escherichia coli strain CFRA109	RDCX01000000	Feces; N/A	Chicken	China	2017	O98:H14	-38	Yes (0.924)	blaCTX-M-15, blaOXA-9, blaTEM-1B	aadA1-like, aph(3')-Ia	-	-	-	-	mdf(A)	-	-	catA1, catB3	-	-	sul1, sul3	tet(B)	dfrA1	12	intI	-	cib, cma, cvaC, fyuA, hlyF, hra, iroN, irp2, iss, lpfA, ompT, papC, sitA, terC, traT	15	IncFIB, IncFII	2
Escherichia coli strain CMJH104a	RDDL01000000	Retail chicken; N/A	-	China	2016	H25	-38/-325	Yes (0.941)	blaCTX-M-65	aac(3)-IV, aadA-like, aph(3')-Ia, aph(4)-Ia	-	fosA3	-	-	mdf(A)	-	-	floR	-	-	sul2	tet(B)	dfrA12	11	intI∆|dfrA12|gcuF|aadA-like	-	gad-like, iss, lpfA, papC, terC	5	-	0
Escherichia coli strain PNUSAE019696	RMKG01000000	N/A	N/A	USA	N/A	H28	-38	Yes (0.941)	-	-	-	-	-	-	mdf(A)	-	-	-	-	-	-	-	-	1	-	-	cea, celb, cia-like, cib, ehxA, epeA-like, espP-like, hra-like, iha, iss, lpfA, ompT, subA, terC, traT, stx1, stx2	17	Col-type, IncB/O/K/Z-like, IncFIB	3
Escherichia coli strain KCRI-82 strain RDK43_82	OVBU01000000	Feces; Clinical	Human	Tanzania	2013	O61:H34	-38	Yes (0.926)	blaTEM-1B	aadA2, aph(3'')-Ib, aph(6)-Id	-	-	-	-	mdf(A), mph(A)	-	-	-	-	-	sul1, sul2	tet(A), tet(B)	dfrA12	11	intI1|dfrA12|gcuF|aadA2|qacE∆1|sul1	-	gad-like, hra, iss, lpfA, neuC, terC	6	IncQ1-like, p0111-type	2
Escherichia coli strain GBGD43	RQUJ01000000	Gut; Commensal	Human	China	2015	O130:H45	-	Yes (0.929)	blaCTX-M-55, blaCTX-M-65, blaOXA-10, blaTEM-like	aac(3)-IV, aadA-like, aph(3'')-Ib, aph(3')-IIa, aph(4)-Ia, aph(6)-Id	mcr-1.1	-	-	-	lnu(F), mdf(A)	-	-	cmlA1, floR	oqxA, oqxB, qnrS1	arr-2	sul2	tet(A)-like	dfrA14	22	intI	-	afaD, astA, cia, cma, cvaC, gad-like, hlyF, iss, iucC, iutA, lpfA, ompT, sitA, terC, traT	15	Col-type, IncFIB, IncFIC, IncFII, IncHI2 (ST3), IncI1-I(Gamma) (ST21, CC-2), IncI2, IncX1, p0111-type	9
Escherichia coli strain GBGD36	RQUC01000000	Gut; Commensal	Human	China	2015	O36:H28	-38	Yes (0.933)	blaCTX-M-55, blaTEM-1B	aac(3)-IV, aadA2, aadA5, aph(3'')-Ib, aph(3')-Ia, aph(4)-Ia, aph(6)-Id, rmtB	mcr-1.1	fosA3	-	-	mdf(A), mph(A)	-	-	catA1, floR	qepA1	-	sul1, sul2	tet(A)	dfrA12, dfrA17	22	intI; qepA4|ISCR3|groEL|orf|rmtB	-	astA, gad-like, hra, iss, lpfA, papA_F19, terC	7	Col-type, IncI2, p0111-type	3
Escherichia coli strain 160	562.42655	Urine; Clinical	Human	USA	2015	O174:H28	-38	Yes (0.935)	blaCTX-M-15, blaTEM-1B	aac(6')-Ib3	-	-	-	-	mdf(A)	-	-	catA1, catB3	-	-	sul1	tet(B)	dfrA1	9	intI1|aac(6')-Ib3|catB3|dfrA1|qacE∆1|sul1	-	hra, iss, lpfA, terC	4	-	0
Escherichia coli strain 161	562.42657	Urine; Clinical	Human	USA	2015	O174:H28	-38	Yes (0.936)	blaCTX-M-15, blaTEM-1B	aac(6')-Ib3	-	-	-	-	mdf(A)	-	-	catA1, catB3	-	-	sul1	tet(B)	dfrA1	9	intI1|aac(6')-Ib3|catB3|dfrA1|qacE∆1|sul1	-	gad, hra, iss, lpfA, terC	5	-	0
Escherichia coli strain 475	562.42745	Urine; Clinical	Human	USA	2017	H9	-	Yes (0.930)	blaCMY-2, blaTEM-1B	aac(6')-Ib3	-	-	-	-	mdf(A)	-	-	catA1, catB3	-	-	sul1	tet(B)	dfrA1	9	intI1|aac(6')-Ib3|catB3|dfrA1|qacE∆1|sul1	-	cba, cib, cma, fyuA, gad, hra, irp2, iss, lpfA, terC, traT	11	IncFII, IncI1-I(Gamma) (ST12), IncY	3
Escherichia coli strain EC_44	SHIP01000000	Liver; Clinical	Chicken	Pakistan	2016	O48:H28	-38	Yes (0.925)	blaCMY-2, blaTEM-1B	aac(6')-Ib3, aadA2b, aph(3'')-Ib, aph(3')-Ia, aph(6)-Id	-	-	-	-	mdf(A)	-	-	catA1, catB3	-	-	sul1	tet(B)	dfrA1, dfrA10	14	intI	-	cib, etsC, hlyF, hra, iroN, iss, iucC, iutA, lpfA, ompT, sitA, terC, traT, tsh	14	IncFIA-like, IncFIB, IncFIC, IncFII, IncI1-I(Gamma)	5		; intI∆-aac(6')-Ib3-catB3-dfrA1
Escherichia coli strain EPA233	SJTC01000000	Wastewater; Environmental	-	USA	2013	O9:H9	-38	Yes (0.930)	blaCMY-2, blaTEM-1B	aac(6')-Ib3	-	-	-	-	mdf(A)	-	-	catA1, catB3	-	-	sul1	tet(B)	dfrA1	9	intI1|aac(6')-Ib3|catB3|dfrA1|qacE∆1|sul1	-	cia-like, fyuA, gad, hra, irp2, lpfA, terC	7	IncI1-I(Gamma) (ST23, CC-2)	1
Escherichia coli strain HUST153	BFLE01000000	Feces; Commensal	Human	Japan	2008	O174:H28	-38	Yes (0.940)	-	-	-	-	-	-	mdf(A)	-	-	-	-	-	-	-	-	1	-	-	lpfA, terC	2	-	0
Escherichia coli strain KS-NP037	BFYS01000000	Feces; Commensal	Cow	Japan	2013	O23:H25	-38	Yes (0.941)	-	-	-	-	-	-	mdf(A)	-	-	-	-	-	-	-	-	1	-	-	f17A, f17G, fyuA, gad, hra-like, irp2, iss, lpfA, ompT, terC, traT	11	IncFIB, IncFII	2
Escherichia coli strain KS-NP075	BFZC01000000	Feces; Commensal	Cow	Japan	2013	O174:H28	-38	Yes (0.931)	blaTEM-1B	-	-	-	-	-	mdf(A)	-	-	floR	-	-	sul2	tet(B)	-	5	-	-	f17A, f17G, gad, hra, iroN-like, lpfA, terC	7	IncX1	1
Escherichia coli strain NS-P067	BGEO01000000	Feces; Commensal	Cow	Japan	2014	H28	-38	Yes (0.940)	-	-	-	-	-	-	mdf(A)	-	-	-	-	-	-	-	-	1	-	-	cea, celb, cia-like, cib, ehxA, epeA-like, espP-like, gad-like, hra-like, iha, iss, lpfA, ompT, terC, traT, stx1, stx2	17	Col-type, IncFIB	2
Escherichia coli strain EELTKB251	SQAV01000000	N/A; Clinical	Human	Estonia	2012	H28	-38	Yes (0.930)	blaCMY-like, blaTEM-1B	aph(3'')-Ib, aph(6)-Id	-	-	-	-	mdf(A)	-	-	catA1	-	-	sul2	tet(A), tet(B)	dfrA1	10	-	-	cib, cvaC, etsC, fyuA, gad-like, hlyF, iroN, irp2, iss, iucC, iutA, lpfA, mchF, ompT, sitA, terC, traT	17	IncFIA, IncFIB, IncFIC, IncFII, IncI1-I(Gamma), IncX1	6
Escherichia coli strain NOR6_9	SQDU01000000	N/A; Clinical	Human	Norway	2012	O109:H51	-38	Yes (0.925)	blaTEM-1B	aac(6')-Ib3	-	-	-	-	mdf(A)	-	-	catA1, catB3	-	-	sul1, sul2	tet(A), tet(B)	dfrA1	10	intI1|aac(6')-Ib3|catB3|dfrA1|qacE∆1|sul1	-	cea, cia-like, cib, cma, etsC, hlyF, hra, iroN, iss-like, iucC, iutA, lpfA, mcbA, ompT, sitA, terC, traT, tsh	18	IncFIB, IncFIC-like, IncI1-I(Gamma) (ST3, CC-3)	3
Escherichia coli strain LVNMSB179	SQIK01000000	N/A; Clinical	Human	Latvia	2012	O142:H28	-38	Yes (0.925)	blaCTX-M-1, blaTEM-1B	aac(6')-Ib3, aadA1	-	-	-	-	lnu(F), mdf(A)	-	-	catA1, catB3	-	-	sul1, sul2	tet(B)	dfrA1	12	intI1|aac(6')-Ib3|catB3|dfrA1|qacE∆1|sul1	-	astA, cib, hra, iss, lpfA, papC, terC	7	Col-type, IncI1-I(Gamma) (ST7, CC-7), IncX1, p0111-type	4
Escherichia coli strain LVNMSB178	SQIL01000000	N/A; Clinical	Human	Latvia	2012	O142:H28	-38	Yes (0.926)	blaCTX-M-1, blaTEM-1B	aac(6')-Ib3, aadA1	-	-	-	-	lnu(F), mdf(A)	-	-	catA1, catB3	-	-	sul1, sul2	tet(B)	dfrA1	12	intI1|aac(6')-Ib3|catB3|dfrA1|qacE∆1|sul1	-	astA, cib, gad-like, hra, iss, lpfA, papC, terC	8	IncI1-I(Gamma) (ST7, CC-7), IncX1, p0111-type	3
Escherichia coli strain EETUKB158	SQMV01000000	N/A; Clinical	Human	Estonia	2012	O142:H28	-38	Yes (0.931)	blaTEM-1B	-	-	-	-	-	mdf(A)	-	-	-	-	-	sul2	tet(B)	dfrA1	5	intI1|dfrA1|aadA-like	-	astA, cib, cvaC, etsC, hlyF, hra, iroN, iss-like, iucC, iutA, lpfA, mchF, ompT, papC, sitA, terC, traT, tsh	18	IncFIB, IncFIC, IncFII, IncI1-I(Gamma) (ST3, CC-3)	4
Escherichia coli strain EEITKB325	SQCH01000000	N/A; Clinical	Human	Estonia	2012	O142:H28	-38	Yes (0.932)	-	aac(6')-Ib3	-	-	-	-	mdf(A)	-	-	catA1, catB3	-	-	sul1	tet(B)	dfrA1	7	intI1|aac(6')-Ib3|catB3|dfrA1|qacE∆1|sul1	-	cvaC, etsC, gad-like, hlyF, hra, iroN, iucC, iutA, lpfA, mchF, ompT, papC, sitA, terC, traT	15	IncFIA-like, IncFIB, IncFIC, IncFII, IncI1-I(Gamma) (ST162), IncI2(Delta)	6
Escherichia coli strain INF13/18/A	WRPL01000000	Blood; Clinical	Human	Malaysia	2018	O29:H28	-38	Yes (0.934)	blaCTX-M-55, blaTEM-1C	-	mcr-1.1	-	-	-	mdf(A)	-	-	floR	-	-	sul2	tet(A), tet(M)	-	8	-	-	cba, cib, cma, cvaC, etsC, gad-like, hlyF, hra, iroN, iss, iucC, iutA, lpfA, mchF, ompT, papA_F19, sitA, terC, traT	19	IncFIA-like, IncFIB, IncFIC, IncFII, IncI1-I(Gamma) (ST162), IncI2(Delta)	6
Escherichia coli strain TzEc011	WSIP01000000	Feces; N/A	Chicken	Tanzania	2015	O174:H28	-38	Yes (0.940)	-	aph(3'')-Ib, aph(6)-Id	-	-	-	-	mdf(A)	-	-	-	-	-	sul2	tet(B)	-	5	-	-	afaA, afaB, f17A, f17G, gad-like, hra-like, lpfA, terC	8	IncX1	1
Escherichia coli CVM N38733PS	JUBX00000000	Feces; N/A	Cattle	USA	2012	O23:H28	-38	Yes (0.937)	blaTEM-1B	-	-	-	-	-	mdf(A)	-	-	floR	-	-	sul1, sul2	-	dfrA1	6	-	-	gad, hra, iss, lpfA, papC-like, terC	6	IncY	1
Escherichia coli CVM N36158PS	JUCR00000000	Feces; N/A	Cattle	USA	2012	O8/160:H16	-38	Yes (0.933)	blaTEM-1B	aac(6')-Ib3	-	-	-	-	mdf(A)	-	-	catA1, catB3, floR	-	-	sul1, sul2	tet(B)	dfrA1	10	intI1|aac(6')-Ib3|catB3|dfrA1|qacE∆1|sul1	-	f17A, hra, iroN-like, iss, lpfA, papC-like, terC	7	-	0
Escherichia coli CVM N33633PS	JUDL00000000	Feces; N/A	Cattle	USA	2011	O99:H12	-38	Yes (0.939)	-	aph(3'')-Ib, aph(6)-Id	-	-	-	-	mdf(A)	-	-	floR	-	-	sul2	tet(A)	-	6	-	-	f17A, f17G, gad-like, hra-like, iroN-like, lpfA, terC	7	Col-type, IncC (ST3)	2
Escherichia coli strain SCcd73	VDIV01000000	N/A	Chicken	N/A	N/A	O45:H25	-38	Yes (0.934)	blaCTX-M-14, blaCTX-M-55, blaDHA-1, blaTEM-1B	aac(3)-IV, aph(3'')-Ib, aph(3')-Ia, aph(4)-Ia, aph(6)-Id, armA, rmtB	mcr-1.1	fosA	-	-	mdf(A), mph(A), mph(E), msr(E)	-	-	catA1, cml-like, floR	oqxA, oqxB-like, qepA-like, qnrB4	-	sul1, sul2, sul3	tet(A), tet(D)	-	29	-	-	astA, gad-like, iss, iucC, iutA, lpfA, sitA, terC, traT	9	IncC (ST3), IncFIA, IncFIB, IncFII, IncFIIK, IncQ1-like, IncR, IncX4	8
Escherichia coli strain G43	VDLC01000000	Feces; N/A	Human	N/A	N/A	O130:H45	-	Yes (0.929)	blaCTX-M-55, blaCTX-M-65, blaOXA-10, blaTEM-like	aac(3)-IV, aadA-like, aph(3'')-Ib, aph(3')-IIa, aph(4)-Ia, aph(6)-Id	mcr-1.1	-	-	-	lnu(F), mdf(A)	-	-	cmlA1, floR	oqxA, oqxB, qnrS1	arr-2	sul2	tet(A)-like	dfrA14	22	intI	-	afaD, astA, cia, cma, cvaC, gad-like, hlyF, iss, iucC, iutA, lpfA, ompT, sitA, terC, traT	15	Col-type, IncFIB, IncFIC, IncFII, IncHI2 (ST3), IncI1-I(Gamma) (ST21, CC-2), IncI2, IncX1, p0111-type	9	repetido?
Escherichia coli strain G36	VDKU01000000	Feces; N/A	Human	N/A	N/A	O36:H28	-38	Yes (0.933)	blaCTX-M-55, blaTEM-1B	aac(3)-IV, aadA2, aadA5, aph(3'')-Ib, aph(3')-Ia, aph(4)-Ia, aph(6)-Id, rmtB	mcr-1.1	fosA3	-	-	mdf(A), mph(A)	-	-	catA1, floR	qepA1	-	sul1, sul2	tet(A)	dfrA12, dfrA17	22	intI; intI∆	-	astA, gad-like, hra, iss, lpfA, papA_F19, terC	7	Col-type, IncI2, p0111-type	3	repetido?
Escherichia coli strain WX288	WVWA01000000	Public transports; Environmental	-	China	2016	H28	-38	Yes (0.935)	blaCTX-M-190, blaTEM-1B	aadA5, aph(3'')-Ib, aph(6)-Id, rmtB	mcr-1.1	fosA3	-	-	mdf(A), mph(A)	-	-	catA1, floR	qepA1	-	sul1, sul2	tet(A)	dfrA17	17	intI; intI|qepA-like|ISCR3|groEL|rmtB	-	astA, hra, iss, lpfA, papA_F19, terC	6	Col-type, IncI2(Delta)	2	ver se não são o mesmo
Escherichia coli strain WX090	WVWF01000000	Public transports; Environmental	-	China	2016	H28	-38	Yes (0.935)	blaCTX-M-190, blaTEM-1B	aadA5, aph(3'')-Ib, aph(6)-Id, rmtB	mcr-1.1	fosA3	-	-	mdf(A), mph(A)	-	-	catA1, floR	qepA1	-	sul1, sul2	tet(A)	dfrA17	17	intI; intI∆; intI|qepA-like|ISCR3|groEL|rmtB	-	astA, hra, iss, lpfA, papA_F19, terC	6	Col-type, IncI2(Delta)	2
Escherichia coli strain WX095	WVWE01000000	Public transports; Environmental	-	China	2016	H28	-38	Yes (0.939)	blaCTX-M-190, blaTEM-1B	aadA5, aph(3'')-Ib, aph(6)-Id, rmtB	mcr-1.1	fosA3	-	-	mdf(A), mph(A)	-	-	catA1, floR	qepA1	-	sul1, sul2	tet(A)	-	16	intI; intI∆; intI|qepA-like|ISCR3|groEL|rmtB|blaTEM-1	-	astA, hra-like, iss, lpfA, terC	5	Col-type, IncI2(Delta)	2		80 nt int
Escherichia coli strain 94EC	CP047576,CP047577,CP047578,CP047579,CP047580,CP047581,CP047582	Feces; Commensal	Human	Singapore	2019	H28	-38	Yes (0.931)	blaCTX-M-65, blaTEM-1B	aac(3)-IV, aph(3'')-Ib, aph(4)-Ia, aph(6)-Id	mcr-1.1	fosA3	-	-	mdf(A)	-	-	floR	-	-	sul2	tet(A), tet(X4)	-	13	-	-	astA, cea, cma, cvaC, etsC, gad, hlyF, hra, iroN, iss, iucC, iutA, lpfA, mchF, ompT, sitA, terC, traT	18	IncFIA-like, IncFIB-like, IncFII, IncI1(Gamma) (ST71, CC-7), IncI2(Delta)-like, IncX1	6	FIC detected but 60% coverage
Escherichia coli strain 3385	JAAASH010000001,JAAASH010000010,JAAASH010000100,JAAASH010000101,JAAASH010000102,JAAASH010000103,JAAASH010000104	Catheter; Clinical	Human	Nigeria	2015	O76:H30	-38	Yes (0.942)	blaCTX-M-15, blaTEM-1B	aph(3'')-Ib-like, aph(6)-Id	-	-	-	-	mdf(A)	-	-	catA1	-	-	sul1, sul2	tet(A)	dfrA14, dfrB4	11	intI	-	gad-like, iss, lpfA, terC	4	-	0
Escherichia coli strain 2821	JAAARY010000001,JAAARY010000010,JAAARY010000100,JAAARY010000101,JAAARY010000102,JAAARY010000103,JAAARY010000104	Catheter; Clinical	Human	Nigeria	2015	O76:H30	-38	Yes (0.941)	blaCTX-M-15, blaTEM-1B	aph(3'')-Ib-like, aph(6)-Id	-	-	-	-	mdf(A)	-	-	catA1	qepA-like	-	sul1, sul2	tet(A)	dfrA14, dfrB4	12	intI	-	gad-like, iss, lpfA, terC	4	-	0
Escherichia coli strain V02	VKIG01000000	Urine; Clinical	Human	France	2009	H25	-38	Yes (0.930)	blaCTX-M-55, blaTEM-1B	aac(6')-Ib3, aadA2, aph(3')-Ia, rmtB	-	-	-	-	mdf(A), mph(A)	-	-	catA1, catA2, catB3	qepA1	-	sul1	tet(B), tet(D), tet(M)	dfrA1, dfrA12	18	intI; intI∆	-	gad-like, hra, iss, lpfA, terC	5	IncI1-I(Gamma) (ST16)	1
Escherichia coli strain V03	VKIF01000000	Urine; Clinical	Human	France	2009	H25	-38	Yes (0.930)	blaCTX-M-55, blaTEM-1B	aac(6')-Ib3, aadA2, aph(3')-Ia, rmtB	-	-	-	-	mdf(A), mph(A)	-	-	catA1, catA2, catB3	qepA-like	-	sul1-like	tet(B), tet(D), tet(M)	dfrA1, dfrA12	18	intI; intI∆	-	gad-like, hra, iss, lpfA, terC	5	IncI1-I(Gamma) (ST16)	1
Escherichia coli strain 24742_1#272	562.57081	N/A	N/A	N/A	2008	H28	-38	Yes (0.939)	blaCTX-M-15, blaOXA-1, blaTEM-1B	aac(3)-IIa, aac(3)-IId, aac(6')-Ib-cr, aadA5	-	-	-	-	mdf(A), mph(A)	-	-	catB3-like	aac(6')-Ib-cr	-	sul1	tet(B)	dfrA12, dfrA17	14	intI1|dfrA17|aadA5|qacE∆1|sul1; intI|dfrA12|gcuF|aadA-like	-	cea, gad, iss, iucC, iutA, lpfA, ompT, sitA, terC, traT	10	IncFIA, IncFIB, IncFII	3	FIC detcted com 70% coverage
Escherichia coli strain PH-2670-18	WLVN01000000	Blood; Clinical	Human	Philippines	2018	O177:H25	-38	Yes (0.932)	blaTEM-1B	aph(3'')-Ib, aph(6)-Id	mcr-1.1	-	-	-	mdf(A)	-	-	-	-	-	sul2	tet(B)	dfrA14	8	intI1|dfrA14|IS6-like	-	cma, cvaC, etsC, gad, hlyF, iroN, iss, iucC, iutA, lpfA, mchF, ompT, papA_F20, papC, sitA, terC, traT	17	IncFIA-like, IncFIB-like, IncFII, IncI2(Delta)-like	4
Escherichia coli strain GZEC065	CP048025,CP048028,CP048026,CP048027	Blood; Clinical	Human	China	2017	H25	-38/-325	Yes (0.934)	blaNDM-5, blaTEM-1B	aac(3)-IId, aadA2, aph(3'')-Ib, aph(3')-Ia, aph(6)-Id	mcr-1.1	fosA3	-	-	mdf(A), mph(A)	-	-	floR	oqxA, oqxB	-	sul2	tet(A)	dfrA12	17	intI1|dfrA12|gcuF|aadA2|qacE|IS6-like	IS6-like|tat|trp|bleMBL|blaNDM-5|IS5-like|IS30-like	astA, cma, cvaC, gad, hlyF, iroN, iss, iucC, iutA, lpfA, ompT, papC, sitA, terC, traT	15	IncFIB-like, IncFIC, IncFII, IncX3, IncY	5	cutA
Escherichia coli strain 89PenNDM	WTFK01000000	Blood; Clinical	Penguin	Brazil	2018	O54:H28	-38	Yes (0.931)	blaNDM-1, blaOXA-1, blaTEM-1B	aac(6')-Ib-cr, aph(3'')-Ib, aph(3')-VI, aph(6)-Id	-	-	-	-	erm(B), mdf(A), mph(A)	-	-	catB3, floR	aac(6')-Ib-cr, qnrB2	arr-3	sul1, sul2	tet(A), tet(B)	-	18	intI∆|aac(6')-Ib-cr|blaOXA-1|catB3|arr3|qacE∆1	ISCR1|tat|trp|bleMBL|blaNDM-1|IS30-like	cba, cea, cia-like, cma, etsC, fyuA, gad-like, hlyF, hra, irp2, iss, iucC, iutA, lpfA, ompT, sitA, terC, traT, tsh	19	IncC (ST3), IncFIB, IncFIC, IncFII	4
Escherichia coli strain M-11	JAALCF010000100,JAALCF010000101,JAALCF010000102,JAALCF010000103,JAALCF010000104,JAALCF010000105,JAALCF010000106	Cloacal swabs; N/A	Chicken	China	2018	H30	-38	Yes (0.935)	blaTEM-1B	aac(3)-IV, aadA1, aadA2, aph(4)-Ia	-	-	-	-	mdf(A)	-	-	cmlA1	-	-	sul3	tet(A)	dfrA12	10	intI1|dfrA12|gcuF|aadA2|cmlA1|aadA1|qacL|tnp|sul3	-	astA, cba, cea, cia, cma, etsC, gad-like, hlyF, hra, iha, ireA, iucC, iutA, lpfA, ompT, papC, sitA, terC, traT	19	Col-type, IncFIB, IncFII, p0111-type	4
Escherichia coli strain 112	562.58748	Feces (cystic fibrosis patient); Clinical	Human	Norway	2006	O54:H28	-38	Yes (0.925)	blaTEM-1A	aac(3)-IIa	-	-	-	-	mdf(A)	-	-	catA1	-	-	-	tet(B)	-	5	-	-	astA, cea, cia-like, cma, etsC, gad-like, hlyF, hra, iroN, iss, iucC, iutA, lpfA, mcbA, ompT, sitA, terC, traT, tsh	19	IncFIB, IncFIC, IncFII	3
Escherichia coli strain 3R	CP049348,CP049349,CP049350,CP049351,CP049352	Cloacal swabs; N/A	Chicken	China	2015	H25	-38/-325	Yes (0.935)	blaCMY-2, blaCTX-M-65, blaNDM-5, blaTEM-1B	rmtB	-	fosA3	-	-	mdf(A)	-	-	-	-	-	-	tet(B)	-	8	-	IS6-like|tat|trp|bleMBL|blaNDM-5|IS5-like	astA, cib, etsC, gad, hlyF, iroN, iss, iucC, iutA, lpfA, ompT, papC, sitA, terC, traT, tsh	16	IncFIB, IncFIC, IncFII, IncI1-I(Gamma) (ST12), IncX3	5	cutA
Escherichia coli strain NIFDS_EC2017_617	WVVE01000000	Food (chicken); Environmental	-	South Korea	2017	H28	-38	Yes (0.928)	blaCTX-M-15, blaTEM-1B	aadA5	-	-	-	-	mdf(A)	-	-	catA1	-	-	sul1	tet(A)	dfrA17	8	intI1|dfrA17|aadA5|qacE∆1|sul1	-	astA, cba, cea, cia-like, cma-like, gad-like, hlyF, hra, iroN, iss, iucC, iutA, lpfA, ompT, sitA, terC, traT	17	IncFIB, IncFII, IncI2	3	FIC detected but 60% coverage
Escherichia coli strain PBIO1942	CADCYT010000001,CADCYT010000002,CADCYT010000003,CADCYT010000004,CADCYT010000005,CADCYT010000006,CADCYT010000007	Flies; Clinical (hospital setting)	Fly	Rwanda	2014	H28	-38/-405	Yes (0.939)	blaCTX-M-15, blaTEM-1B	-	-	-	-	-	mdf(A)	-	-	-	-	-	-	tet(B)	-	4	-	-	gad-like, iss, lpfA, terC	4	IncFIB, IncFII	2
Escherichia coli strain SECR18-0888	JABAJL010000001,JABAJL010000010,JABAJL010000100,JABAJL010000101,JABAJL010000102,JABAJL010000103,JABAJL010000104	N/A; Clinical	Human	South Korea	2018	O123:H28	-38	Yes (0.931)	blaCTX-M-55, blaNDM-1, blaTEM-like	aac(3)-IV, aadA2, aadA5, aph(3'')-Ib, aph(3')-Ia, aph(4)-Ia, aph(6)-Id, rmtB	mcr-1.1	fosA3	-	-	mdf(A), mph(A)	-	-	catA1, catB3-like, floR	qepA1	arr-3	sul1, sul2	tet(A)	dfrA12, dfrA17	25	intI1	ISCR1|trp|bleMBL|blaNDM-1|IS30-like|catB3-like|arr3	astA, cib, gad-like, hra, iss, lpfA, papA_F19, terC, traT	9	IncFIA, IncFII, IncI2, p0111-type	4	FIC detcted com 70% coverage
Escherichia coli strain C21	CP052877,CP052878,CP052879,CP052880,CP052881	N/A	Chicken	China	2009	O51:H28	-38	Yes (0.930)	blaCTX-M-55, blaTEM-1B	aac(3)-IId, aadA2, aph(3'')-Ib, aph(3')-IIa, aph(6)-Id, rmtB	-	-	-	-	mdf(A)	-	-	floR	oqxA, oqxB	-	sul1, sul2	tet(A)	dfrA12	16	intI1|dfrA12|gcuF|aadA2|qacE∆1|sul1|ISCR1|rmtB|blaTEM-1B	-	astA, gad, lpfA, terC	4	IncI1-I(Gamma), IncI2, IncN, IncX1, p0111-type	5
Escherichia coli strain MCE11	JABMIQ010000052,JABMIQ010000051,JABMIQ010000050,JABMIQ010000049,JABMIQ010000048,JABMIQ010000047,JABMIQ010000046	Urine; N/A	Human	Kenya	2016	O177:H28	-38/-405	Yes (0.931)	blaCTX-M-15, blaOXA-1	aac(3)-IIa, aac(6')-Ib-cr, aadA1, aadA2, aph(3')-Ia-like	-	-	-	-	mdf(A), mef(B)	-	-	catA1, catB3-like, cmlA1	aac(6')-Ib-cr, qnrS13	-	sul3	tet(A)	dfrA12	16	intI1|dfrA12|gcuF|aadA2|cmlA1|aadA1|qacL|IS256-like|sul3	-	cea, cia, gad-like, iss, lpfA, papC, terC, traT	8	Col-type, IncFII, IncI1-I(Gamma) (ST183), IncN, IncX1, p0111-type	6	qnrS1?
Escherichia coli strain INSRA6015	LLKU01000000	Urine; Clinical	Human	Portugal	2015	O8/30:H28	-38	Yes (0.934)	blaCMY-2, blaTEM-1B	-	-	-	-	-	mdf(A)	-	-	catA1	qepA4	-	sul1	tet(B)	dfrB4-like	8	intI	-	gad-like, hra, iss, lpfA, terC	5	-	0
Escherichia coli MS 117-3	ADTS00000000	Gastrointestinal tract; N/A	Human	N/A	N/A	O66:H28	-38	Yes (0.931)	blaTEM-1B	aac(3)-IId, aadA5, aph(3'')-Ib, aph(3')-Ia, aph(6)-Id-like	-	-	-	-	mdf(A)	-	-	-	-	-	sul2	tet(B)	dfrA17	10	intI1|dfrA17|aadA5	-	cba, cia, cma, hra, iss, lpfA, terC, traT, tsh	9	Col-type, IncFII, IncI1-I(Gamma), IncX4	4	FIC detcted com 70% coverage		dfrA weird position with int
