# Supplementary material for: Report and Comparative Genomics of an NDM-5-Producing Escherichia coli in a Portuguese Hospital: Complex Class 1 Integrons as Important Players in blaNDM Spread
Source: Microorganisms. 2022 Nov 12;10(11):2243. doi: 10.3390/microorganisms10112243 (PMC9693474; doi:10.3390/microorganisms10112243)
Supplement: Supplementary file 1 [file microorganisms-10-02243-s001.zip › Table S7.xlsx]

## Sheet: Sheet1
Genome Name	PATRIC Genome ID	Isolation Country	Isolation Source	Host Name	Host Health	Collection Year	MLST
Escherichia coli CR694	562.5411	Australia	Urine	Human	Urinary tract infection	2014	648
Escherichia coli K-12 strain 66	83333.986	Egypt	Unknown	Human	-	Unknown	405
Escherichia coli K-12 strain SIEC017	83333.991	Unknown	Stool	Human	Unknown	2017	410
Escherichia coli K-12 strain SIEC197	83333.994	Unknown	Blood	Human	Infection	2018	410
Escherichia coli ST167	562.5415	United States	Abdominal wound	Human	Infection	2013	167
Escherichia coli strain 100	562.59444	Italy	Fecal swab	Human	Unknown	2018	167
Escherichia coli strain 116	562.13671	Norway	Anal swabs from chicken commercial farm	Human	Cystic fibrosis	2007	6393
Escherichia coli strain 163	562.58147	Unknown	Environment	-	-	2019	167
Escherichia coli strain 164	562.58142	Unknown	Environment	-	-	2019	167
Escherichia coli strain 165	562.41991	Unknown	Unknown	-	-	Unknown	101
Escherichia coli strain 165	562.42660	United States	Abdominal	Human	Unknown	2015	101
Escherichia coli strain 219	562.42008	Unknown	Unknown	-	-	Unknown	167
Escherichia coli strain 219	562.42677	United States	Blood	Human	Infection	2016	167
Escherichia coli strain 222	562.42679	United States	Urine	Human	Unknown	2015	405
Escherichia coli strain 222	562.42010	Unknown	Unknown	-	-	Unknown	405
Escherichia coli strain 3.K8EC	562.45780	Unknown	Environment	-	-	2018	361
Escherichia coli strain 311	562.59446	Italy	Fecal swab	Human	Unknown	2019	167
Escherichia coli strain 3512	562.25388	China	Stool	Human	Unknown	2016	533
Escherichia coli strain 38	562.58150	Unknown	Environment	-	-	2019	410
Escherichia coli strain 443	562.13722	China	Sewage from slaughterhouse	-	-	2015	2480
Escherichia coli strain 446	562.13563	China	Cloaca swabs from commercial farm	Chicken	Unknown	2014	2480
Escherichia coli strain 447	562.13611	China	Cloaca swabs from commercial farm	Chicken	Unknown	2014	2480
Escherichia coli strain 450	562.13567	China	Cloaca swabs from commercial farm	Chicken	Unknown	2014	2480
Escherichia coli strain 453	562.13613	China	Cloaca swabs from commercial farm	Chicken	Unknown	2014	101
Escherichia coli strain 458	562.13576	China	Cloaca swabs from commercial farm	Chicken	Unknown	2015	6391
Escherichia coli strain 461	562.13619	China	Cloaca swabs from commercial farm	Chicken	Unknown	2015	354
Escherichia coli strain 462	562.13617	China	Cloaca swabs from commercial farm	Chicken	Unknown	2015	226
Escherichia coli strain 463	562.13616	China	Cloaca swabs from commercial farm	Chicken	Unknown	2015	617
Escherichia coli strain 469	562.13696	China	Anal swabs from chicken commercial farm	Dog	Unknown	2015	361
Escherichia coli strain 473	562.13594	China	Cloaca swabs from commercial farm	Chicken	Unknown	2015	226
Escherichia coli strain 475	562.13595	China	Cloaca swabs from commercial farm	Chicken	Unknown	2015	361
Escherichia coli strain 477	562.13590	China	Cloaca swabs from commercial farm	Chicken	Unknown	2015	361
Escherichia coli strain 479	562.13627	China	Cloaca swabs from commercial farm	Chicken	Unknown	2015	361
Escherichia coli strain 481	562.13582	China	Cloaca swabs from commercial farm	Chicken	Unknown	2015	2480
Escherichia coli strain 483	562.13648	China	Chicken commercial farm	Fly	Unknown	2015	6390
Escherichia coli strain 484	562.13653	China	Chicken commercial farm	Fly	Unknown	2015	6390
Escherichia coli strain 486	562.13652	China	Chicken commercial farm	Fly	Unknown	2015	227
Escherichia coli strain 489	562.13656	China	Chicken commercial farm	Fly	Unknown	2015	156
Escherichia coli strain 491	562.13666	China	Chicken commercial farm	Fly	Unknown	2015	746
Escherichia coli strain 495	562.13710	China	Chicken commercial farm	Fly	Unknown	2015	6393
Escherichia coli strain 496	562.13670	China	Chicken commercial farm	Fly	Unknown	2015	6388
Escherichia coli strain 498	562.13711	China	Chicken commercial farm	Fly	Unknown	2015	156
Escherichia coli strain 499	562.13714	China	Anal swabs from chicken commercial farm	Dog	Unknown	2015	361
Escherichia coli strain 500	562.13698	China	Anal swabs from chicken commercial farm	Dog	Unknown	2015	746
Escherichia coli strain 501	562.13715	China	Anal swabs from chicken commercial farm	Dog	Unknown	2015	226
Escherichia coli strain 502	562.13700	China	Anal swabs from chicken commercial farm	Dog	Unknown	2015	746
Escherichia coli strain 503	562.13637	China	Cloaca swabs from commercial farm	Chicken	Unknown	2015	162
Escherichia coli strain 50664179	562.8477	Norway	Urine	Human	Unknown	2012	636
Escherichia coli strain 507	562.13636	China	Cloaca swabs from commercial farm	Chicken	Unknown	2015	617
Escherichia coli strain 510	562.13640	China	Cloaca swabs from commercial farm	Chicken	Unknown	2015	10
Escherichia coli strain 51008369SK1	562.30390	Switzerland	Wound liquid	Dog	Wounded	2018	167
Escherichia coli strain 513	562.13705	China	Faeces swabs of swallow from chicken commercial farm	Swallow	Unknown	2015	101
Escherichia coli strain 515	562.13687	China	Faeces swabs of swallow from chicken commercial farm	Swallow	Unknown	2015	10
Escherichia coli strain 52148	562.59140	Czech Republic	Urine	Human	Kidney transplantation	2019	167
Escherichia coli strain 552	562.13659	China	Chicken commercial farm	Fly	Unknown	2015	746
Escherichia coli strain 554	562.13629	China	Cloaca swabs from commercial farm	Chicken	Unknown	2015	226
Escherichia coli strain 557	562.13630	China	Cloaca swabs from commercial farm	Chicken	Unknown	2015	101
Escherichia coli strain 559	562.13654	China	Chicken commercial farm	Fly	Unknown	2015	648
Escherichia coli strain 566	562.13724	China	Faeces swabs from chicken commercial farm	Human	Unknown	2015	48
Escherichia coli strain 578	562.13583	China	Cloaca swabs from commercial farm	Chicken	Unknown	2015	101
Escherichia coli strain 582	562.13641	China	Cloaca swabs from commercial farm	Chicken	Unknown	2015	162
Escherichia coli strain 584	562.13713	China	Anal swabs from chicken commercial farm	Dog	Unknown	2015	746
Escherichia coli strain 585	562.13622	China	Cloaca swabs from commercial farm	Chicken	Unknown	2015	6388
Escherichia coli strain 587	562.13560	China	Cloaca swabs from commercial farm	Chicken	Unknown	2014	101
Escherichia coli strain 600	562.13625	China	Cloaca swabs from commercial farm	Chicken	Unknown	2015	354
Escherichia coli strain 602	562.13697	China	Anal swabs from chicken commercial farm	Dog	Unknown	2015	746
Escherichia coli strain 604	562.13624	China	Cloaca swabs from commercial farm	Chicken	Unknown	2015	226
Escherichia coli strain 606	562.13623	China	Cloaca swabs from commercial farm	Chicken	Unknown	2015	6388
Escherichia coli strain 616	562.13561	China	Cloaca swabs from commercial farm	Chicken	Unknown	2014	101
Escherichia coli strain 621	562.13574	China	Cloaca swabs from commercial farm	Chicken	Unknown	2015	354
Escherichia coli strain 622	562.13581	China	Cloaca swabs from commercial farm	Chicken	Unknown	2015	156
Escherichia coli strain 624	562.13621	China	Cloaca swabs from commercial farm	Chicken	Unknown	2015	6388
Escherichia coli strain 625	562.13573	China	Cloaca swabs from commercial farm	Chicken	Unknown	2015	354
Escherichia coli strain 630	562.13602	China	Sewage from commercial farm	-	-	2015	226
Escherichia coli strain 632	562.13712	China	Anal swabs from chicken commercial farm	Dog	Unknown	2015	361
Escherichia coli strain 633	562.13672	China	Anal swabs from chicken commercial farm	Dog	Unknown	2015	48
Escherichia coli strain 637	562.13663	China	Chicken commercial farm	Fly	Unknown	2015	6390
Escherichia coli strain 638	562.13651	China	Chicken commercial farm	Fly	Unknown	2015	1518
Escherichia coli strain 639	562.13662	China	Chicken commercial farm	Fly	Unknown	2015	746
Escherichia coli strain 640	562.13667	China	Chicken commercial farm	Fly	Unknown	2015	226
Escherichia coli strain 641	562.13723	China	Faeces swabs from chicken commercial farm	Human	Unknown	2015	10
Escherichia coli strain 642	562.13655	China	Chicken commercial farm	Fly	Unknown	2015	6388
Escherichia coli strain 643	562.13658	China	Chicken commercial farm	Fly	Unknown	2015	746
Escherichia coli strain 644	562.13661	China	Chicken commercial farm	Fly	Unknown	2015	10
Escherichia coli strain 646	562.13699	China	Anal swabs from chicken commercial farm	Dog	Unknown	2015	746
Escherichia coli strain 647	562.13719	China	Anal swabs from chicken commercial farm	Dog	Unknown	2015	746
Escherichia coli strain 653	562.13644	China	Cloaca swabs from commercial farm	Chicken	Unknown	2015	1114
Escherichia coli strain 654	562.13639	China	Cloaca swabs from commercial farm	Chicken	Unknown	2015	10
Escherichia coli strain 655	562.13643	China	Cloaca swabs from commercial farm	Chicken	Unknown	2015	1114
Escherichia coli strain 659	562.13716	China	Legs and breast from supermarket	Chicken	-	2015	10
Escherichia coli strain 660	562.13676	China	Legs and breast from supermarket	Chicken	-	2015	226
Escherichia coli strain 674	562.13562	China	Cloaca swabs from commercial farm	Chicken	Unknown	2014	2480
Escherichia coli strain 675	562.13679	China	Legs and breast from supermarket	Chicken	-	2015	115
Escherichia coli strain 675SK2	562.29033	Switzerland	Water	-	-	2016	617
Escherichia coli strain 676	562.13628	China	Cloaca swabs from commercial farm	Chicken	Unknown	2015	361
Escherichia coli strain 678	562.13578	China	Cloaca swabs from commercial farm	Chicken	Unknown	2015	156
Escherichia coli strain 681	562.13668	China	Chicken commercial farm	Fly	Unknown	2015	746
Escherichia coli strain 682	562.13702	China	Legs and breast from supermarket	Chicken	-	2015	6377
Escherichia coli strain 683	562.13664	China	Chicken commercial farm	Fly	Unknown	2015	10
Escherichia coli strain 684	562.13685	China	Faeces swabs from chicken commercial farm	Human	Unknown	2015	746
Escherichia coli strain 686	562.13660	China	Chicken commercial farm	Fly	Unknown	2015	48
Escherichia coli strain 694	562.13610	China	Cloaca swabs from commercial farm	Chicken	Unknown	2014	101
Escherichia coli strain 704	562.13580	China	Cloaca swabs from commercial farm	Chicken	Unknown	2015	167
Escherichia coli strain 705	562.28190	China	Cloaca swabs from commercial farm	Chicken	Unknown	2014	2480
Escherichia coli strain 711	562.13686	China	Faeces swabs of swallow from chicken commercial farm	Swallow	Unknown	2015	6417
Escherichia coli strain 714	562.13718	China	Legs and breast from supermarket	Chicken	-	2015	746
Escherichia coli strain 801	562.29143	China	Unknown	Human	-	2017	2736
Escherichia coli strain 802	562.29141	China	Unknown	Human	-	2017	2736
Escherichia coli strain 803	562.29142	China	Unknown	Human	-	2017	2736
Escherichia coli strain 91	562.59445	Italy	Fecal swab	Human	Unknown	2018	167
Escherichia coli strain 92	562.59442	Italy	Fecal swab	Human	Unknown	2018	167
Escherichia coli strain A016d	562.52603	China	Fecal sample	Dog	Unknown	2015	167
Escherichia coli strain A016f	562.52601	China	Fecal sample	Fly	Unknown	2015	48
Escherichia coli strain A025ch	562.52614	China	Fecal sample	Chicken	Unknown	2015	8666
Escherichia coli strain A043ch	562.52615	China	Fecal sample	Chicken	Unknown	2015	48
Escherichia coli strain A043p1	562.52580	China	Fecal sample	Pig	Unknown	2015	1178
Escherichia coli strain A045h	562.52629	China	Fecal sample	Human	Unknown	2015	648
Escherichia coli strain A053p	562.52578	China	Fecal sample	Pig	Unknown	2015	1178
Escherichia coli strain A054ch	562.52612	China	Fecal sample	Chicken	Unknown	2015	1178
Escherichia coli strain A062p	562.52577	China	Fecal sample	Pig	Unknown	2015	1178
Escherichia coli strain A40	562.30799	China	Feces	Human	Unknown	2016	410
Escherichia coli strain AMA1167	562.24780	Denmark	Liver	Human	Unknown	2015	410
Escherichia coli strain AR_0150	562.17621	Unknown	Unknown	-	-	Unknown	167
Escherichia coli strain AR_0151	562.24654	Unknown	Unknown	-	-	Unknown	167
Escherichia coli strain AR_452	562.30434	Unknown	Unknown	-	-	Unknown	156
Escherichia coli strain AR202.2	562.50948	Switzerland	Rectal swab	Dog	Unknown	2018	167
Escherichia coli strain AR216.2b	562.50949	Switzerland	Rectal swab	Dog	Unknown	2017	167
Escherichia coli strain B010p	562.52576	China	Fecal sample	Pig	Unknown	2015	542
Escherichia coli strain B013p1	562.52640	China	Fecal sample	Pig	Unknown	2015	48
Escherichia coli strain B013p2	562.52573	China	Fecal sample	Pig	Unknown	2015	167
Escherichia coli strain B019ch	562.52610	China	Fecal sample	Chicken	Unknown	2015	226
Escherichia coli strain B019d	562.52602	China	Fecal sample	Dog	Unknown	2015	Unknown
Escherichia coli strain B024ch	562.52609	China	Fecal sample	Chicken	Unknown	2015	48
Escherichia coli strain B029ch	562.52631	China	Fecal sample	Chicken	Unknown	2015	1638
Escherichia coli strain B030f	562.52600	China	Fecal sample	Fly	Unknown	2015	4618
Escherichia coli strain B042f	562.52599	China	Fecal sample	Fly	Unknown	2015	8670
Escherichia coli strain B053h	562.52627	China	Fecal sample	Human	Unknown	2015	3856
Escherichia coli strain B12243	562.28582	India	Blood	Human	Blood stream infection	2016	410
Escherichia coli strain B17565	562.28592	India	Blood	Human	Blood stream infection	2016	405
Escherichia coli strain B19783	562.28597	India	Blood	Human	Blood stream infection	2016	617
Escherichia coli strain B24823	562.28574	India	Blood	Human	Blood stream infection	2016	2659
Escherichia coli strain B25762	562.28581	India	Blood	Human	Blood stream infection	2016	2851
Escherichia coli strain B26737	562.28598	India	Blood	Human	Blood stream infection	2016	167
Escherichia coli strain B32065	562.28594	India	Blood	Human	Blood stream infection	2015	410
Escherichia coli strain B32512	562.28587	India	Blood	Human	Blood stream infection	2016	167
Escherichia coli strain B33531	562.28589	India	Blood	Human	Blood stream infection	2015	167
Escherichia coli strain B6770	562.28579	India	Blood	Human	Blood stream infection	2016	405
Escherichia coli strain BA12315	562.28573	India	Blood	Human	Blood stream infection	2016	361
Escherichia coli strain BA14434	562.28575	India	Blood	Human	Blood stream infection	2016	5954
Escherichia coli strain BA16089	562.28591	India	Blood	Human	Blood stream infection	2016	167
Escherichia coli strain BA17187	562.36163	India	Blood	Human	Blood stream infection	2017	1284
Escherichia coli strain BA29965	562.28569	India	Blood	Human	Blood stream infection	2016	8346
Escherichia coli strain BA33057	562.28588	India	Blood	Human	Blood stream infection	2015	167
Escherichia coli strain BA3358	562.36166	India	Blood	Human	Blood stream infection	2017	156
Escherichia coli strain BA34774	562.28576	India	Blood	Human	Blood stream infection	2015	405
Escherichia coli strain BA7132	562.28586	India	Blood	Human	Blood stream infection	2016	44
Escherichia coli strain BA9313	562.28593	India	Blood	Human	Blood stream infection	2016	131
Escherichia coli strain BJ10	562.10825	China	Liver ascites	Human	Rectal cancer with liver metastases	2015	156
Escherichia coli strain BP3354	562.28577	India	Blood	Human	Blood stream infection	2016	405
Escherichia coli strain BP9671	562.36161	India	Blood	Human	Blood stream infection	2017	167
Escherichia coli strain BV643	562.28585	India	Blood	Human	Blood stream infection	2016	410
Escherichia coli strain BWH68	562.16482	United States	Abdominal Fluid	Human	Infection	2015	2480
Escherichia coli strain C013p	562.52575	China	Fecal sample	Pig	Unknown	2015	609
Escherichia coli strain C017p	562.52574	China	Fecal sample	Pig	Unknown	2015	1638
Escherichia coli strain C035f	562.52596	China	Fecal sample	Fly	Unknown	2015	206
Escherichia coli strain C047h	562.52626	China	Fecal sample	Human	Unknown	2015	224
Escherichia coli strain CH611_eco	562.24493	China	Urine from cystostomy	Human	Intra-abdominal infections	2015	4981
Escherichia coli strain CH613_eco	562.17276	China	Urine, bladder	Human	Unknown	2015	10
Escherichia coli strain CM IVRI KOL-1	562.58374	Unknown	Mastitis Milk	Unknown	-	2012	167
Escherichia coli strain CRE1493	562.28132	China	Rectal Swab	Human	Unknown	2013	167
Escherichia coli strain CRE87	562.33769	United States	Blood	Human	Bacterial infectious disease	2016	405
Escherichia coli strain CREC-591	562.24788	South Korea	Peritoneal fluid	Human	Infection	2015	101
Escherichia coli strain D010p	562.52566	China	Fecal sample	Pig	Unknown	2015	1178
Escherichia coli strain D038f	562.52595	China	Fecal sample	Fly	Unknown	2015	226
Escherichia coli strain D054ch	562.52607	China	Fecal sample	Chicken	Unknown	2015	744
Escherichia coli strain DASSIM7486973	562.48263	Unknown	Stool	Human	Unknown	2014	2083
Escherichia coli strain E007h	562.52623	China	Fecal sample	Human	Unknown	2015	648
Escherichia coli strain E009f	562.52597	China	Fecal sample	Fly	Unknown	2015	48
Escherichia coli strain E025f	562.52594	China	Fecal sample	Fly	Unknown	2015	6756
Escherichia coli strain E036p	562.52563	China	Fecal sample	Pig	Unknown	2015	515
Escherichia coli strain E038h	562.52587	China	Fecal sample	Human	Unknown	2015	746
Escherichia coli strain E040p	562.52618	China	Fecal sample	Pig	Unknown	2015	5919
Escherichia coli strain E059f	562.52593	China	Fecal sample	Fly	Unknown	2015	48
Escherichia coli strain E1	562.8512	China	Blood	Human	Plasma cell leukemia	2014	167
Escherichia coli strain E159	562.19097	China	Feces	Human	Diarrhea	2017	206
Escherichia coli strain E2	562.8510	China	Blood	Human	Plasma cell leukemia	2014	167
Escherichia coli strain E2239	562.19099	China	Blood	Human	Bacteremia	2014	167
Escherichia coli strain E3	562.8513	China	Nasal fester cultures	Human	Plasma cell leukemia	2014	167
Escherichia coli strain E4	562.8511	China	Nasal fester cultures	Human	Plasma cell leukemia	2014	167
Escherichia coli strain E4219	562.19101	China	Blood	Human	Bacteremia	2015	7386
Escherichia coli strain E4903	562.19098	China	Blood	Human	Bacteremia	2015	167
Escherichia coli strain E5	562.8514	China	Nasal fester cultures	Human	Plasma cell leukemia	2014	167
Escherichia coli strain E6	562.8515	China	Nasal fester cultures	Human	Plasma cell leukemia	2014	167
Escherichia coli strain E834	562.19102	China	Blood	Human	Bacteremia	2014	167
Escherichia coli strain E834	562.19100	China	Blood	Human	Bacteremia	2015	167
Escherichia coli strain EBJ001	562.28429	China	Urine	Human	Unknown	2014	167
Escherichia coli strain EBJ003	562.28428	China	Urine	Human	Unknown	2014	405
Escherichia coli strain EC_340	562.39107	Pakistan	Washroom sink in hospital intensive care unit	-	-	2016	4450
Escherichia coli strain Ec_S1_6	562.34348	Italy	Unknown	Human	Unknown	2015	1702
Escherichia coli strain Ec-050	562.50775	Unknown	Stool	Human	Colonization	2018	167
Escherichia coli strain EC-129	562.46711	Japan	Unknown	Human	Unknown	2018	167
Escherichia coli strain EC2	562.53977	USA	Urine	Human	sepsis	2017	167
Escherichia coli strain Ec2551	562.39450	China	Urine	Human	Unknown	2017	48
Escherichia coli strain ECCRA-119	562.28978	China	Feces	Unknown	Unknown	2017	156
Escherichia coli strain ECM_39	562.58304	Unknown	Unknown	Human	Unknown	2017	940
Escherichia coli strain ECM_49	562.58298	Unknown	Unknown	Human	Unknown	2018	167
Escherichia coli strain ECM_62	562.58293	Unknown	Unknown	Human	Unknown	2018	46
Escherichia coli strain ECM_70	562.58313	Unknown	Unknown	Human	Unknown	2018	405
Escherichia coli strain ECO2947	562.53978	China	Pus	Human	Clinical	2018	5415
Escherichia coli strain ECOL-18-VL-LA-PA-Ryan-0026	562.50505	USA	Trach wash	Dog	Unknown	2018	167
Escherichia coli strain ecoli012	562.39488	Switzerland	Hospital	Human	Clinical	2012	448
Escherichia coli strain ecoli018	562.39494	Switzerland	Hospital	Human	Clinical	2012	448
Escherichia coli strain ECONIH6	562.28208	United States	Patients and hospital environment	Human	Clinical	2016	167
Escherichia coli strain ECS9	562.47716	China	Unknown	Human	Cerebral hemorrhage	2018	410
Escherichia coli strain ECWJ1	562.30426	Unknown	Urine	Human	Urinary tract infection	2017	167
Escherichia coli strain EJN001	562.28431	China	Urine	Human	Unknown	2014	167
Escherichia coli strain EJN003	562.28427	China	Blood	Human	Infection	2014	167
Escherichia coli strain ESY001	562.28430	China	Blood	Human	Infection	2014	167
Escherichia coli strain ESY002	562.28432	China	Blood	Human	Infection	2014	167
Escherichia coli strain ESY003	562.28426	China	Sputum	Human	Unknown	2014	167
Escherichia coli strain F004f	562.52591	China	Fecal sample	Fly	Unknown	2015	361
Escherichia coli strain F012ca	562.52613	China	Fecal sample	Cow	Unknown	2015	8667
Escherichia coli strain F037p1	562.52564	China	Fecal sample	Pig	Unknown	2015	6907
Escherichia coli strain F037p2	562.52562	China	Fecal sample	Pig	Unknown	2015	6907
Escherichia coli strain F054ch	562.52605	China	Fecal sample	Chicken	Unknown	2015	8666
Escherichia coli strain F056p	562.52561	China	Fecal sample	Pig	Unknown	2015	744
Escherichia coli strain F060p	562.52560	China	Fecal sample	Pig	Unknown	2015	744
Escherichia coli strain F071h	562.52584	China	Fecal sample	Human	Unknown	2015	6793
Escherichia coli strain FC10274	562.19566	China	Unknown	Human	Unknown	2013	448
Escherichia coli strain FDAARGOS_427	562.22305	Canada	Urine	Human	Unknown	2015	617
Escherichia coli strain FDAARGOS_433	562.24729	Canada	Rectal	Human	Unknown	2015	410
Escherichia coli strain FDAARGOS_434	562.22323	Canada	Rectal	Human	Unknown	2014	167
Escherichia coli strain FDAARGOS_448	562.22307	Canada	Urine	Human	Unknown	2014	405
Escherichia coli strain G006p1	562.52617	China	Fecal sample	Pig	Unknown	2015	206
Escherichia coli strain G006p2	562.52556	China	Fecal sample	Pig	Unknown	2015	10
Escherichia coli strain G007p	562.52554	China	Fecal sample	Pig	Unknown	2015	48
Escherichia coli strain G008p	562.52555	China	Fecal sample	Pig	Unknown	2015	34
Escherichia coli strain G009h	562.52625	China	Fecal sample	Human	Unknown	2015	6910
Escherichia coli strain G009p1	562.52553	China	Fecal sample	Pig	Unknown	2015	6831
Escherichia coli strain G009p2	562.52551	China	Fecal sample	Pig	Unknown	2015	206
Escherichia coli strain G017p	562.52552	China	Fecal sample	Pig	Unknown	2015	1011
Escherichia coli strain G018h	562.52586	China	Fecal sample	Human	Unknown	2015	48
Escherichia coli strain G028h	562.52585	China	Fecal sample	Human	Unknown	2015	48
Escherichia coli strain G029f	562.52592	China	Fecal sample	Fly	Unknown	2015	206
Escherichia coli strain G029p	562.52550	China	Fecal sample	Pig	Unknown	2015	6831
Escherichia coli strain G031p	562.52540	China	Fecal sample	Pig	Unknown	2015	48
Escherichia coli strain G041p	562.52547	China	Fecal sample	Pig	Unknown	2015	6395
Escherichia coli strain GB788	562.28182	China	Feces	Human	Unknown	2016	46
Escherichia coli strain GEO_49_Eff_A	562.39455	United States	Water	-	-	2017	167
Escherichia coli strain GSH8M-2	562.51603	Japan	Wastewater treatment plant effluent	-	-	2018	542
Escherichia coli strain GZ04-0086	562.45775	China	Stool	Human	Unknown	2018	44
Escherichia coli strain GZB8C100M	562.60371	China	Lung	Chicken	Unknown	2018	8387
Escherichia coli strain GZB8C105M	562.60367	China	Intestinal	Chicken	Unknown	2018	8387
Escherichia coli strain GZB8C10M	562.60374	China	Fecal sample	Chicken	Unknown	2018	6725
Escherichia coli strain GZB8C110M	562.60363	China	Intestinal	Chicken	Unknown	2018	746
Escherichia coli strain GZB8C112M	562.60368	China	Intestinal	Chicken	Unknown	2018	8388
Escherichia coli strain GZB8C113M	562.60369	China	Intestinal	Chicken	Unknown	2018	48
Escherichia coli strain GZB8C114M	562.60364	China	Intestinal	Chicken	Unknown	2018	6725
Escherichia coli strain GZB8C127M	562.60366	China	Soil	-	-	2018	6725
Escherichia coli strain GZB8C133M	562.60365	China	Drinking water	-	-	2018	8382
Escherichia coli strain GZB8C139M	562.60360	China	Drinking water	-	-	2018	6725
Escherichia coli strain GZB8C141M	562.60362	China	Drinking water	-	-	2018	8382
Escherichia coli strain GZB8C146M	562.60356	China	Drinking water	-	-	2018	10
Escherichia coli strain GZB8C149M	562.60354	China	Drinking water	-	-	2018	167
Escherichia coli strain GZB8C14M	562.60386	China	Fecal sample	Chicken	Unknown	2018	167
Escherichia coli strain GZB8C159M	562.60361	China	Feed	-	-	2018	167
Escherichia coli strain GZB8C15M	562.60376	China	Fecal sample	Chicken	Unknown	2018	167
Escherichia coli strain GZB8C163M	562.60370	China	Feed	-	-	2018	6725
Escherichia coli strain GZB8C166M	562.60355	China	Feed	-	-	2018	10
Escherichia coli strain GZB8C1M	562.60381	China	Fecal sample	Chicken	Unknown	2018	10
Escherichia coli strain GZB8C20M	562.60377	China	Fecal sample	Chicken	Unknown	2018	746
Escherichia coli strain GZB8C26M	562.60375	China	Fecal sample	Chicken	Unknown	2018	167
Escherichia coli strain GZB8C2M	562.60383	China	Fecal sample	Chicken	Unknown	2018	6802
Escherichia coli strain GZB8C37M	562.60429	China	Fecal sample	Chicken	Unknown	2018	167
Escherichia coli strain GZB8C38M	562.60373	China	Fecal sample	Chicken	Unknown	2018	167
Escherichia coli strain GZB8C41M	562.60380	China	Fecal sample	Chicken	Unknown	2018	167
Escherichia coli strain GZB8C45M	562.60372	China	Fecal sample	Chicken	Unknown	2018	6746
Escherichia coli strain GZB8C46M	562.60431	China	Fecal sample	Chicken	Unknown	2018	6725
Escherichia coli strain GZB8C4M	562.60382	China	Fecal sample	Chicken	Unknown	2018	8318
Escherichia coli strain GZB8C53M	562.60357	China	Fecal sample	Chicken	Unknown	2018	167
Escherichia coli strain GZB8C54M	562.60349	China	Fecal sample	Chicken	Unknown	2018	746
Escherichia coli strain GZB8C56M	562.60358	China	Fecal sample	Chicken	Unknown	2018	746
Escherichia coli strain GZB8C57M	562.60351	China	Fecal sample	Chicken	Unknown	2018	167
Escherichia coli strain GZB8C58M	562.60352	China	Fecal sample	Chicken	Unknown	2018	167
Escherichia coli strain GZB8C59M	562.60350	China	Fecal sample	Chicken	Unknown	2018	10
Escherichia coli strain GZB8C60M	562.60348	China	Fecal sample	Chicken	Unknown	2018	10
Escherichia coli strain GZB8C66M	562.60353	China	Heart	Chicken	Unknown	2018	746
Escherichia coli strain GZB8C8M	562.60432	China	Fecal sample	Chicken	Unknown	2018	8318
Escherichia coli strain GZB8C93M	562.60378	China	Spleen	Chicken	Unknown	2018	10
Escherichia coli strain GZB8C9M	562.60379	China	Fecal sample	Chicken	Unknown	2018	6725
Escherichia coli strain GZEC065	562.58132	China	Blood	Human	Infection	2017	156
Escherichia coli strain H001p	562.52544	China	Fecal sample	Pig	Unknown	2015	730
Escherichia coli strain H022p	562.52616	China	Fecal sample	Pig	Unknown	2015	730
Escherichia coli strain H045h	562.52622	China	Fecal sample	Human	Unknown	2015	181
Escherichia coli strain H058p	562.52546	China	Fecal sample	Pig,	Unknown	2015	1011
Escherichia coli strain HN1-26	562.51550	China	Unknown	Duck	Unknown	2018	354
Escherichia coli strain HR119	562.34042	Egypt	Unknown	Human	Unknown	2016	167
Escherichia coli strain HR163	562.34041	Egypt	Dog Environment	-	-	2016	410
Escherichia coli strain HR164	562.34040	Egypt	Dog Environment	-	-	2016	410
Escherichia coli strain HR165	562.34036	Egypt	Dog Environment	-	-	2016	410
Escherichia coli strain HR166	562.34035	Egypt	Dog Environment	-	-	2016	410
Escherichia coli strain HR167	562.34034	Egypt	Dog Environment	-	-	2016	410
Escherichia coli strain HR169	562.34039	Egypt	Dog Environment	-	-	2016	410
Escherichia coli strain HR170	562.34038	Egypt	Dog Environment	-	-	2016	410
Escherichia coli strain I003p	562.52539	China	Fecal sample	Pig	Unknown	2015	744
Escherichia coli strain I025f	562.52590	China	Fecal sample	Fly	Unknown	2015	206
Escherichia coli strain I027ch	562.52604	China	Fecal sample	Chicken	Unknown	2015	48
Escherichia coli strain IVRI Kol CP4	562.58373	Unknown	Mastitis Milk	Unknown	-	2012	410
Escherichia coli strain J037ch	562.52606	China	Fecal sample	Chicken	Unknown	2015	167
Escherichia coli strain J041p	562.52543	China	Fecal sample	Pig	Unknown	2015	6908
Escherichia coli strain jhyyecs5	562.47705	China	Urine	Human	Unknown	2018	410
Escherichia coli strain jhyyecs9	562.47706	China	Unknown	Human	Cerebral hemorrhage	2017	410
Escherichia coli strain jhyys9	562.50788	China	Blood	Human	Cerebral hemorrhage	2018	410
Escherichia coli strain jhzxyyecs5	562.50549	China	Urine	Human	Unknown	2018	410
Escherichia coli strain K025h	562.52581	China	Fecal sample	Human	Unknown	2015	7366
Escherichia coli strain K19CRE38	562.58439	South Korea	Unknown	Dog	Unknown	2019	410
Escherichia coli strain KBN10P04869	562.28406	South Korea	Blood	Human	Infection	2017	410
Escherichia coli strain L020p	562.52541	China	Fecal sample	Pig	Unknown	2015	6910
Escherichia coli strain L054h	562.52621	China	Fecal sample	Human	Unknown	2015	10
Escherichia coli strain L100	562.39412	China	Unknown	Unknown	-	2018	48
Escherichia coli strain L1016	562.45411	China	Feces	Human	Unknown	2018	167
Escherichia coli strain L103-2	562.39451	China	Unknown	Unknown	-	2018	8667
Escherichia coli strain L213	562.45425	China	Feces	Human	Unknown	2016	617
Escherichia coli strain L214	562.45428	China	Feces	Human	Unknown	2016	7454
Escherichia coli strain L239	562.45424	China	Feces	Human	Unknown	2016	7454
Escherichia coli strain L37	562.39164	China	Anus swab	Unknown	Unknown	2018	48
Escherichia coli strain L41-1	562.39413	China	Unknown	Unknown	Unknown	2018	48
Escherichia coli strain L53	562.39414	China	Anal swab	Unknown	-	2018	48
Escherichia coli strain L610	562.45422	China	Feces	Human	Unknown	2017	167
Escherichia coli strain L612	562.45421	China	Feces	Human	Unknown	2017	167
Escherichia coli strain L65	562.39411	China	Unknown	Unknown	Unknown	2018	3076
Escherichia coli strain L665	562.45420	China	Feces	Human	Unknown	2017	167
Escherichia coli strain L725	562.45680	China	Feces	Human	Unknown	2017	2161
Escherichia coli strain L743	562.45418	China	Feces	Human	Unknown	2017	167
Escherichia coli strain L833	562.45416	China	Feces	Human	Unknown	2017	167
Escherichia coli strain L862	562.45415	China	Feces	Human	Unknown	2017	2973
Escherichia coli strain L906	562.45402	China	Feces	Human	Unknown	2017	8640
Escherichia coli strain L930	562.45413	China	Feces	Human	Unknown	2017	48
Escherichia coli strain L932	562.45412	China	Feces	Human	Unknown	2017	48
Escherichia coli strain L935	562.45410	China	Feces	Human	Unknown	2017	48
Escherichia coli strain M-0970-X3	562.59097	China	Unknown	Companion animal	Unknown	2012	405
Escherichia coli strain M-10194-X3	562.59094	China	Unknown	Companion animal	Unknown	2013	617
Escherichia coli strain M-10-X3	562.58405	China	Unknown	Chicken	Unknown	2018	1564
Escherichia coli strain M-11-X3	562.58406	China	Unknown	Chicken	Unknown	2018	156
Escherichia coli strain M-16-X3	562.59104	China	Pork from farmers market	Pig	Unknown	2016	542
Escherichia coli strain M-18-X3	562.59103	China	Chicken from supermarket	Chicken	Unknown	2016	58
Escherichia coli strain M-1-X3	562.59105	China	Chicken manure compost	-	-	2019	354
Escherichia coli strain M217	562.39092	Myanmar	Unknown	Human	Unknown	2015	167
Escherichia coli strain M-22-X3	562.59102	China	Fly on pig farm	Fly	Unknown	2016	871
Escherichia coli strain M-23-X3	562.59101	China	Fly on chicken farm	Fly	Unknown	2016	744
Escherichia coli strain M-28-X3	562.59100	China	Unknown	Human	Unknown	2016	131
Escherichia coli strain M-2-X3	562.59106	China	Chicken manure compost	-	-	2019	224
Escherichia coli strain M-3-X3	562.59107	China	Chicken manure compost	-	-	2019	43
Escherichia coli strain M505	562.61712	Unknown	Unknown	Human	Unknown	Unknown	8453
Escherichia coli strain M-A19-X3	562.59098	China	Unknown	Pig	Unknown	2017	542
Escherichia coli strain M-C45-X3	562.59099	China	Unknown	Pig	Unknown	2017	Unknown
Escherichia coli strain MCR1_NJ	562.11333	United States	Urine culture	Human	Urinary tract infection	2014	7358
Escherichia coli strain M-D22-X3	562.59095	China	Unknown	Pig	Unknown	2017	206
Escherichia coli strain M-DH5a-X3	562.58394	Unknown	Unknown	Unknown	Unknown	Unknown	1060
Escherichia coli strain MEH_META	562.17355	Lebanon	Unknown	Human	Unknown	2016	405
Escherichia coli strain MEH1	562.36253	Lebanon	Unknown	Human	Unknown	Unknown	405
Escherichia coli strain MER690	562.52726	China	Leaf rape	-	-	2018	10
Escherichia coli strain MGH169	562.16480	United States	Unknown	Human	Unknown	2015	167
Escherichia coli strain MH10	562.60447	China	Unknown	Horse	Unknown	2018	641
Escherichia coli strain MH14	562.60451	China	Unknown	Horse	Unknown	2018	641
Escherichia coli strain MH19	562.60449	China	Unknown	Horse	Unknown	2018	10
Escherichia coli strain MH9B	562.60448	China	Unknown	Horse	Unknown	2018	224
Escherichia coli strain M-S51-X3	562.59093	China	Unknown	Human	Unknown	2016	359
Escherichia coli strain M-S69-X3	562.59092	China	Unknown	Human	Unknown	2016	744
Escherichia coli strain M-S87-X3	562.59096	China	Unknown	Human	Unknown	2016	90
Escherichia coli strain N7	562.61627	South Korea	Wastewater treatment plant	-	-	2018	746
Escherichia coli strain NA703	562.11489	India	Pus	Human	Infection	2014	167
Escherichia coli strain NA724	562.11494	India	Pus	Human	Infection	2014	405
Escherichia coli strain NGCE-94	562.46195	Bangladesh	Urine	Human	Urine Infection	2018	361
Escherichia coli strain NIPH17_0020	562.50452	Cambodia	Pus	Human	Clinical	2017	410
Escherichia coli strain NJJYYY51-CR	562.61578	China	Mid-stage urine	Human	Unknown	2015	297
Escherichia coli strain NJLSYY40-CR	562.61581	China	Mid-stage urine	Human	Hydronephrosis	2015	156
Escherichia coli strain NJMJYY4-CR	562.61583	China	Sputum	Human	Cerebral infarction, pulmonary infection	2015	3489
Escherichia coli strain NJSDYYY42-CR	562.61579	China	Unknown	Human	Unknown	Unknown	683
Escherichia coli strain NJSETYY11-CR	562.61574	China	Sputum	Human	Neonatal pneumonia	2015	410
Escherichia coli strain PB231	562.57450	Thailand	Pus	Human	Clinical	2015	46
Escherichia coli strain PEC-NDM	562.30347	Niger	Unknown	Human	Unknown	2017	167
Escherichia coli strain pV11-19-E11-025-038	562.58365	South Korea	Unknown	Dog	Unknown	2019	1721
Escherichia coli strain s65460	562.45967	China	Bile	Human	Postoperative hilar cholangiocarcinoma (recurrence of margin) and Biliary tract infection	2017	167
Escherichia coli strain s65527	562.45966	China	Bile	Human	Postoperative hilar cholangiocarcinoma (recurrence of margin) and Biliary tract infection	2017	167
Escherichia coli strain SCEC020007	562.28143	China	Unknown	Human	Unknown	2016	167
Escherichia coli strain ScEc7	562.59165	China	Lung	Unknown	Unknown	2017	2003
Escherichia coli strain SCEC88	562.25384	China	Unknown	Human	Unknown	2017	6388
Escherichia coli strain SCNJ06	562.58448	China	Sputum	Human	Cancer	2018	167
Escherichia coli strain SFE8	562.59451	China	Feces from pig	Pig	Unknown	2019	533
Escherichia coli strain SIEC018	562.46705	Unknown	Stool	Human	Unknown	2017	410
Escherichia coli strain SIEC084	562.46709	Unknown	Urine	Human	Unknown	2017	410
Escherichia coli strain SL16	562.55261	Unknown	Rectal swab	Human	Unknown	2014	90
Escherichia coli strain ST167:947385799	562.7839	South Africa	urine	Human	Unknown	2013	167
Escherichia coli strain ST410_CP-Ec25	562.37140	France	Rectal Swap	Human	Unknown	2015	410
Escherichia coli strain ST410_CP-Ec9	562.37120	France	Rectal Swap	Human	Unknown	2014	410
Escherichia coli strain TUM17824	562.39150	Japan	Vietnamese medical tourist	Human	Unknown	2017	617
Escherichia coli strain TUM18780	562.61515	Japan	Japanese patient with no history of travel abroad	Human	Clinical	2018	1011
Escherichia coli strain TUM18781	562.61514	Japan	Japanese patient with no history of travel abroad	Human	Clinical	2018	2040
Escherichia coli strain UK_Dog_Liverpool	562.33783	United Kingdom	Foreleg infected wound	Dog	Foot lacerations, dog bite wounds and urinary tract infections	2016	410
Escherichia coli strain VH1	562.30248	China	Cucumber	-	-	2017	10
Escherichia coli strain WCHEC005237	562.28387	China	Rectal swab	Human	Unknown	2014	167
Escherichia coli strain WCHEC005784	562.29018	China	Rectal swab	Human	Unknown	2014	617
Escherichia coli strain WCHEC020031	562.36256	China	Unknown	Human	Unknown	2016	410
Escherichia coli strain WCHEC025943C1G0	562.30293	China	Unknown	Unknown	Unknown	2017	10
Escherichia coli strain WCHEC025943C1G1000LB	562.30292	China	Unknown	Unknown	Unknown	2017	10
Escherichia coli strain WCHEC025943C1G1000M9	562.30300	China	Unknown	Unknown	Unknown	2017	10
Escherichia coli strain WCHEC025943C2G0	562.30297	China	Unknown	Unknown	Unknown	2017	10
Escherichia coli strain WCHEC025943C2G1000LB	562.30284	China	Unknown	Unknown	Unknown	2017	10
Escherichia coli strain WCHEC025943C2G1000M9	562.30291	China	Unknown	Unknown	Unknown	2017	10
Escherichia coli strain WCHEC025943C3G1000M9	562.30290	China	Unknown	Unknown	Unknown	Unknown	10
Escherichia coli strain WCHEC025970	562.45678	China	Unknown	Human	Unknown	2017	167
Escherichia coli strain WCHEC1	562.17412	China	Unknown	Human	Unknown	2016	410
Escherichia coli strain WCHEC16	562.17405	China	Unknown	Human	Unknown	2016	167
Escherichia coli strain WCHEC1943	562.25382	China	Sewage	-	-	2017	410
Escherichia coli strain WCHEC22	562.17413	China	Unknown	Human	Unknown	2016	156
Escherichia coli strain WCHEC26	562.17406	China	Unknown	Human	Unknown	2016	410
Escherichia coli strain WCHEC28	562.17404	China	Unknown	Human	Unknown	2016	3052
Escherichia coli strain WCHEC32	562.17402	China	Unknown	Human	Unknown	2016	410
Escherichia coli strain WCHEC33	562.17411	China	Unknown	Human	Unknown	2016	167
Escherichia coli strain WCHEC4	562.17409	China	Unknown	Human	Unknown	2016	448
Escherichia coli strain WCHEC5	562.17408	China	Unknown	Human	Unknown	2016	359
Escherichia coli strain WCHEC66	562.17410	China	Unknown	Human	Unknown	2017	6823
Escherichia coli strain WCHEC68	562.17403	China	Unknown	Human	Unknown	2017	2480
Escherichia coli strain WCHEC7	562.17407	China	Unknown	Human	Unknown	2016	167
Escherichia coli strain WCHEC-LL123	562.19532	China	Unknown	Human	Unknown	2017	206
Escherichia coli strain XN3-1	562.51549	China	Feces	Poultry	Unknown	2018	10
Escherichia coli strain YJ4	562.61715	Unknown	Unknown	Human	Unknown	Unknown	8453
Escherichia coli strain YJ6	562.61716	Unknown	Unknown	Human	Unknown	Unknown	48
Escherichia coli strain ZSH6	562.33983	China	Blood	Unknown	Infection	2018	Unknown
Escherichia sp. R15	2082629.3	China	Sewage	-	-	2017	744
