# Supplementary figures and images for: Report and Comparative Genomics of an NDM-5-Producing Escherichia coli in a Portuguese Hospital: Complex Class 1 Integrons as Important Players in blaNDM Spread
Source: MDPI journal article supplement (doi:10.3390/microorganisms10112243), 2022-11-12

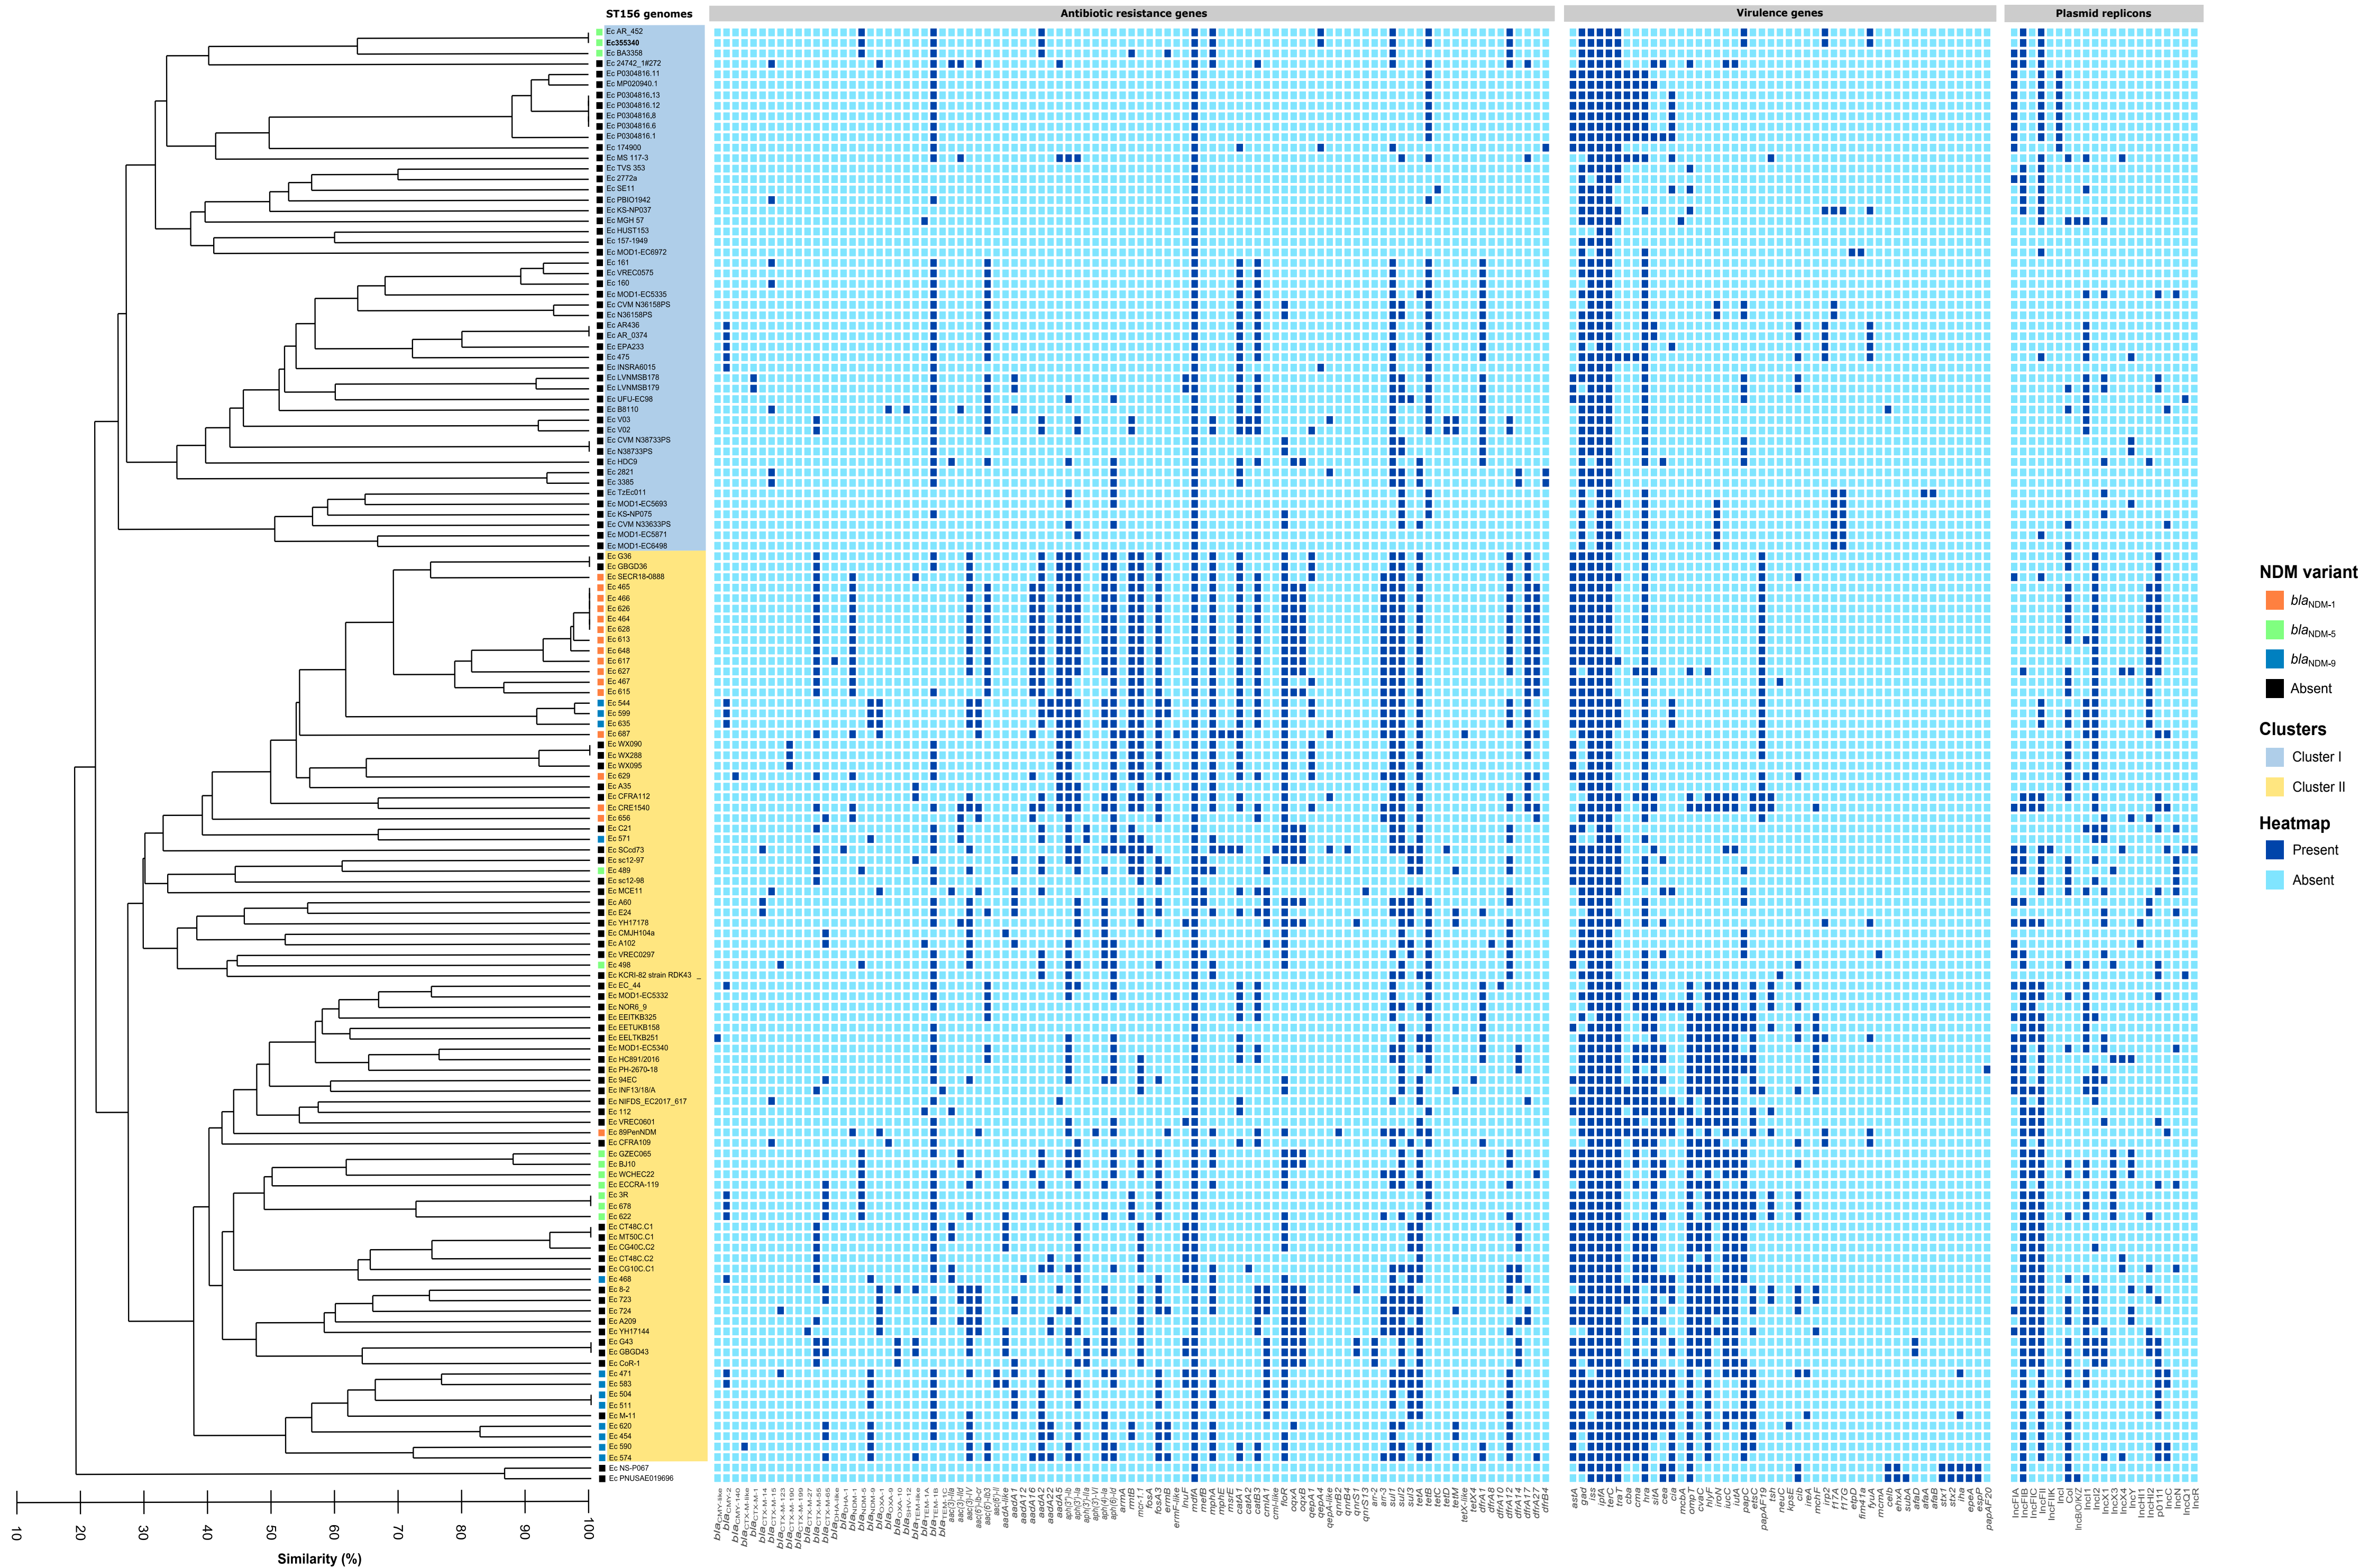

Supplement: s1 [file s1]

Tree scale: 0.001

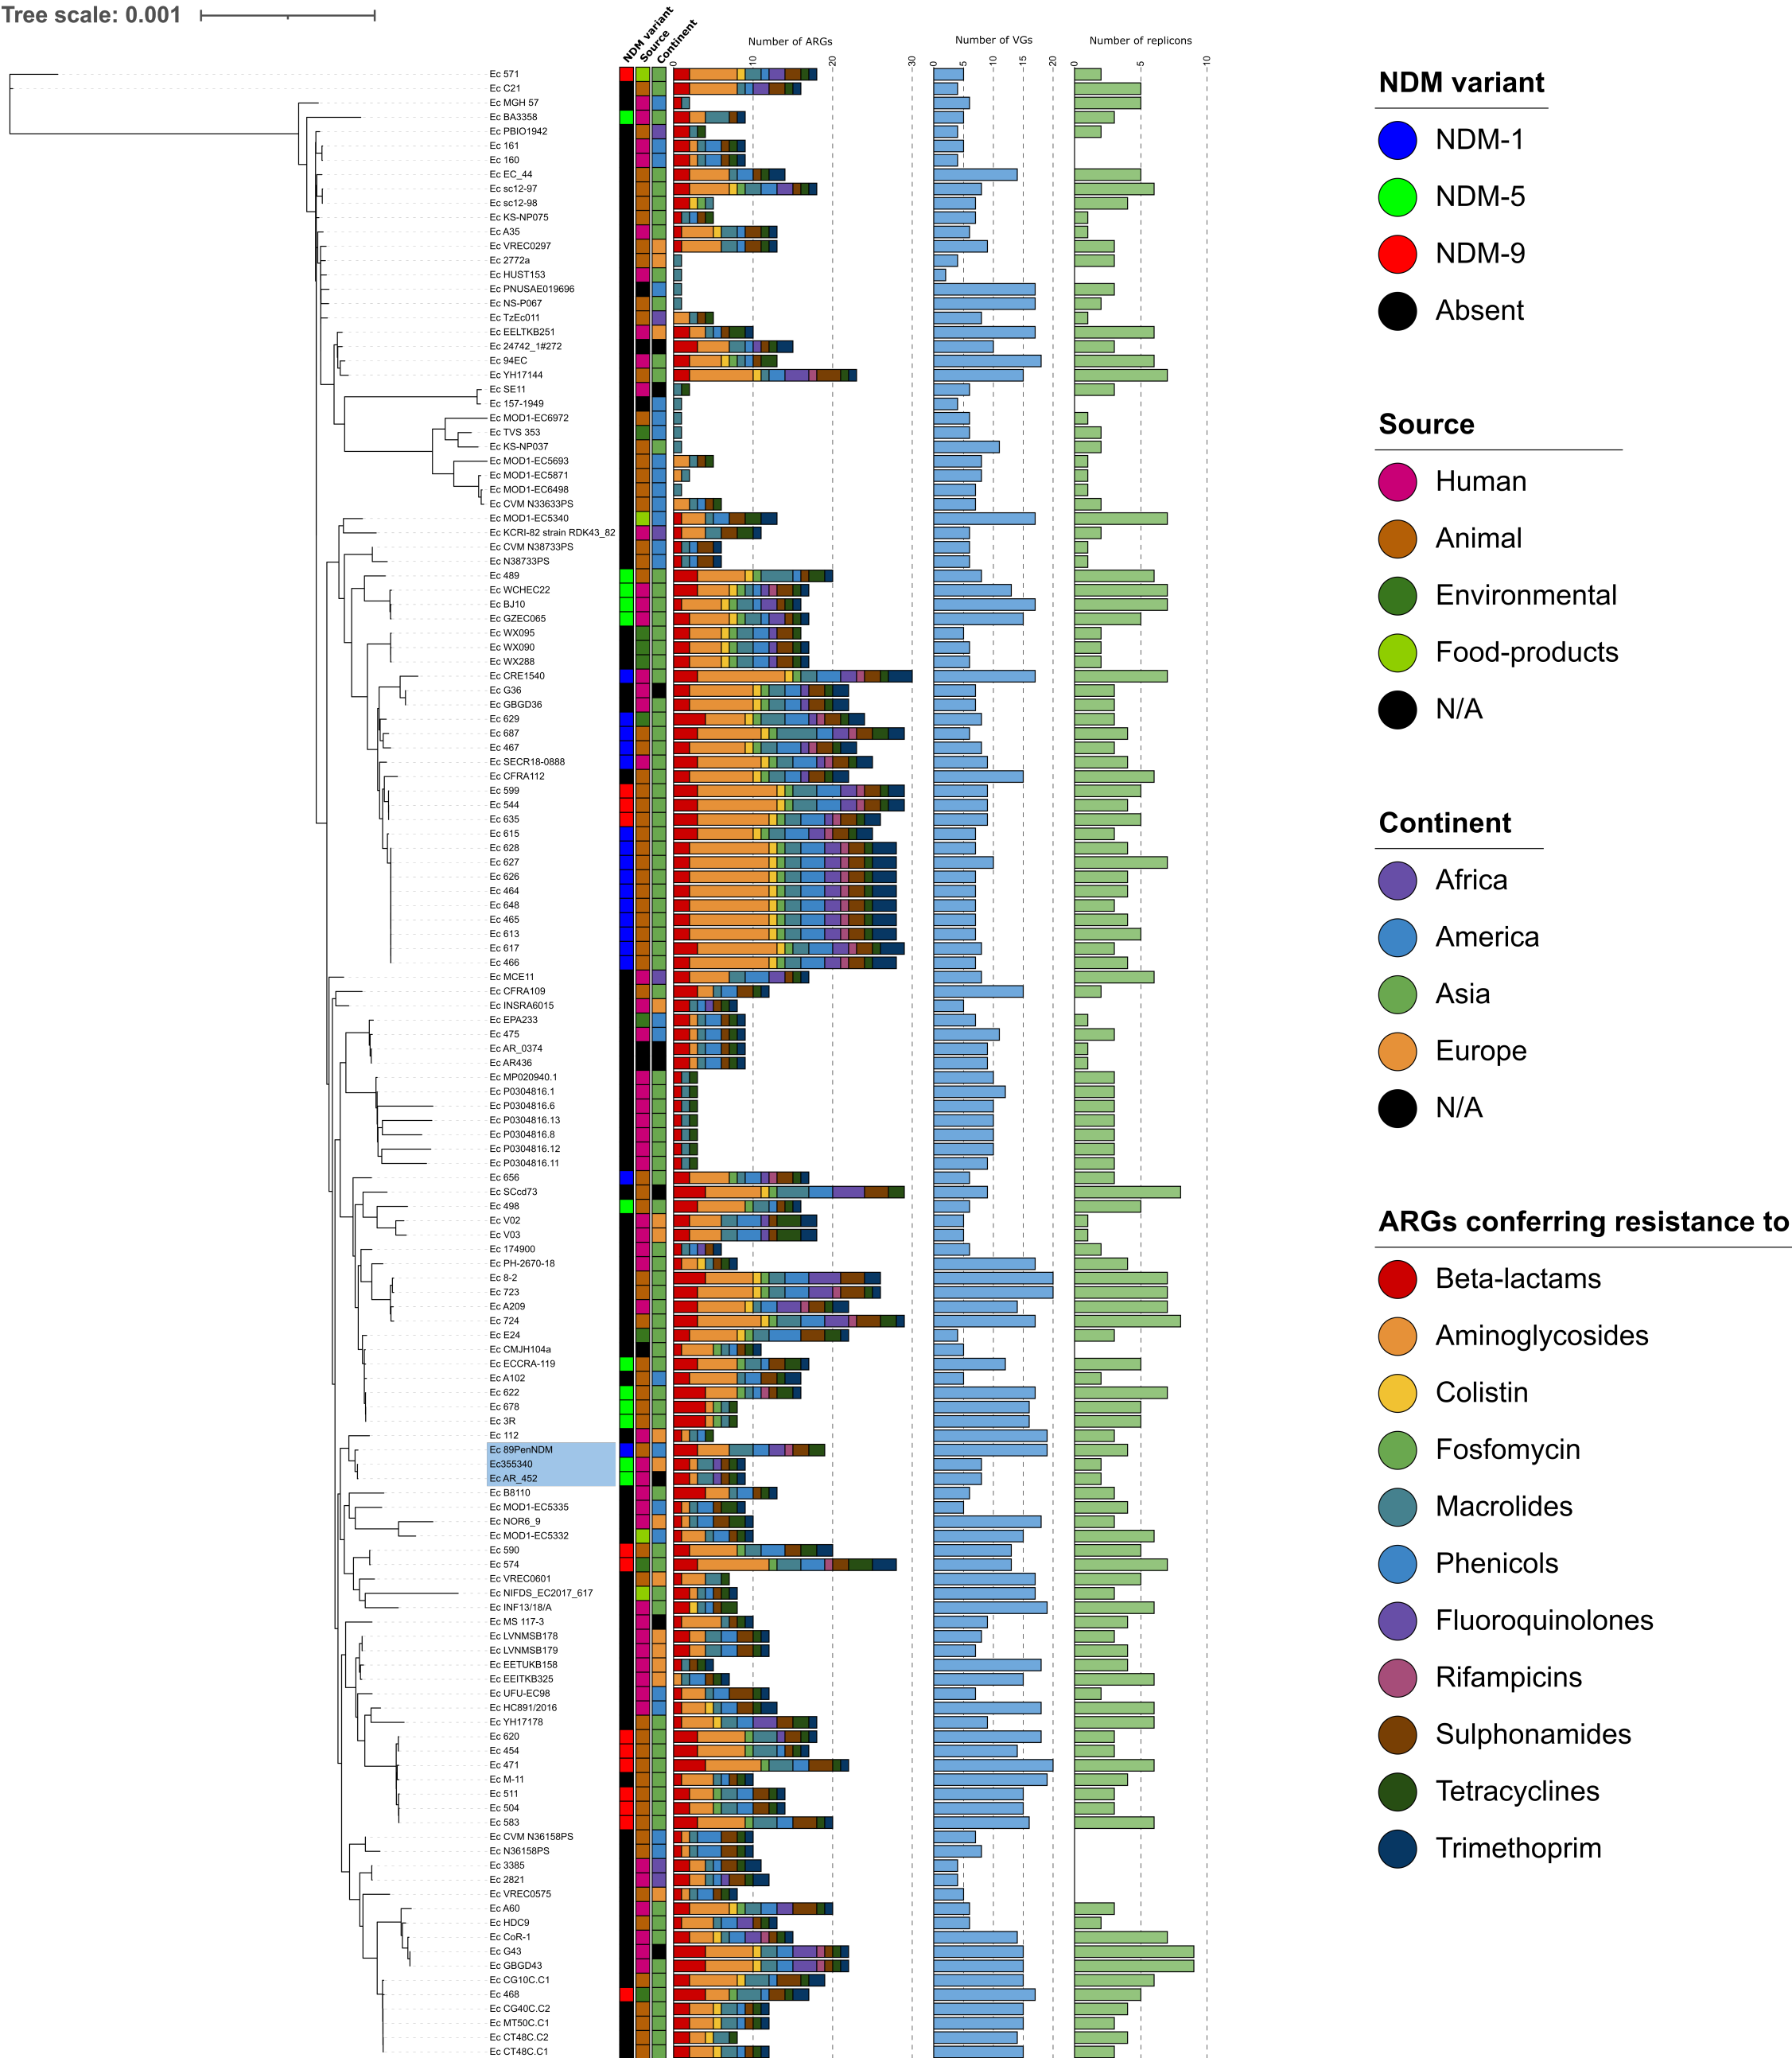

Supplement: s1 [file s1]
